# Supplementary material for: A deep learning system for differential diagnosis of skin diseases
Source: Springer Nature journal article supplement (doi:10.1038/s41591-020-0842-3), 2020-05-18
Supplement: 41591_2020_842_MOESM1_ESM.pdf [file 41591_2020_842_MOESM1_ESM.pdf]

In the format provided by the authors and unedited.

# A deep learning system for differential diagnosis of skin diseases

Yuan Liu<sup>1</sup> , Ayush Jain<sup>1</sup>, Clara Eng<sup>1</sup>, David H. Way<sup>1</sup>, Kang Lee<sup>1</sup>, Peggy Bui<sup>1,2</sup>, Kimberly Kanada<sup>3</sup>, Guilherme de Oliveira Marinho<sup>4</sup>, Jessica Gallegos<sup>1</sup>, Sara Gabriele<sup>1</sup>, Vishakha Gupta<sup>1</sup>, Nalini Singh<sup>1,5</sup>, Vivek Natarajan<sup>1</sup>, Rainer Hofmann-Wellenhof<sup>6</sup>, Greg S. Corrado<sup>1</sup>, Lily H. Peng<sup>1</sup>, Dale R. Webster<sup>1</sup>, Dennis Ai<sup>1</sup>, Susan J. Huang<sup>3</sup>, Yun Liu<sup>1</sup> , R. Carter Dunn<sup>1,7</sup> and David Coz<sup>1,7</sup>

---

<sup>1</sup>Google Health, Palo Alto, CA, USA. <sup>2</sup>University of California, San Francisco, San Francisco, CA, USA. <sup>3</sup>Advanced Clinical, Deerfield, IL, USA. <sup>4</sup>Adecco Staffing, Santa Clara, CA, USA. <sup>5</sup>Massachusetts Institute of Technology, Cambridge, MA, USA. <sup>6</sup>Medical University of Graz, Graz, Austria. <sup>7</sup>These authors contributed equally: R. Carter Dunn, David Coz. ✉e-mail: [liuyun@google.com](mailto:liuyun@google.com)

# Supplementary Information

## Supplementary Methods

### Labeler onboarding and certification

In addition to formal board certification, all study participants (dermatologists, PCPs, and NPs) underwent an onboarding process to familiarize with the grading tools. In particular, the dermatologists comprising the reference standard graded 147 cases randomly sampled from the development set as an assessment to ensure consistent grading. For each case, their leading diagnosis was compared to the aggregated opinion of a panel of three experienced U.S. board-certified dermatologists, and only dermatologists who had a top-3 accuracy exceeding 60% participated in determining the reference standard for the validation set. This threshold was chosen based on the statistics of dermatologist grader accuracy, so as to leave room for disagreement in complex cases while ensuring a minimum consistency in grading following guidelines (e.g. specificity of diagnoses) and familiarity with the tool. Among 53 dermatologists who completed the test, the average score was 69%. Three dermatologists did not meet the 60% threshold; none of these dermatologists graded the validation set.

### Reference standard voting procedure and reproducibility

Here, we detail the voting procedure<sup>47</sup> used to improve reproducibility of our reference standard (Supplementary Fig. 10). First, each dermatologist provided up to three differential diagnoses and accompanying confidence values in the range [1, 5] for each of the diagnosis. Next, each diagnosis was mapped to a condition. If duplicates occurred (i.e. multiple diagnoses were mapped to the same condition), the highest confidence was retained. The relative ranks of the mapped conditions were used to rank the conditions into a differential diagnosis (i.e. primary, secondary, and tertiary diagnosis). Each mapped condition was then assigned a weight: the inverse of the rank. If multiple mapped conditions shared the same confidence, then the weight was evenly distributed across the conditions. Answers from the dermatologists were then aggregated to form the reference standard, by summing up the weights, before limiting the skin condition classes to 27 (26 conditions plus “Other”) and normalizing their weights to sum to 1. Distribution of the number of conditions in the differential diagnosis for each set is shown in Supplementary Fig. 8. Detailed analysis of the secondary and tertiary diagnoses that are provided alongside every primary diagnosis is shown in Supplementary Fig. 9.

To investigate the reproducibility of the reference standard, for validation set B, three other random dermatologists from the same pool (who had not seen the case

previously) graded the cases independently, following the exact same labeling procedure as before. Reference standard differential diagnoses from the two panels of three dermatologists had an AO of 0.63 and an agreement of 0.74 for the primary diagnosis (compared to an AO of 0.54 and an agreement of 0.61 between two random individual dermatologists, one per panel), when considered in the space of 419 mapped conditions. Within the space of 27 conditions handled by DLS, the two panels had an AO of 0.70 and an agreement of 0.77 (compared to an AO of 0.60 and an agreement of 0.66 between two random individual dermatologists, one per panel).

# Supplementary Figures

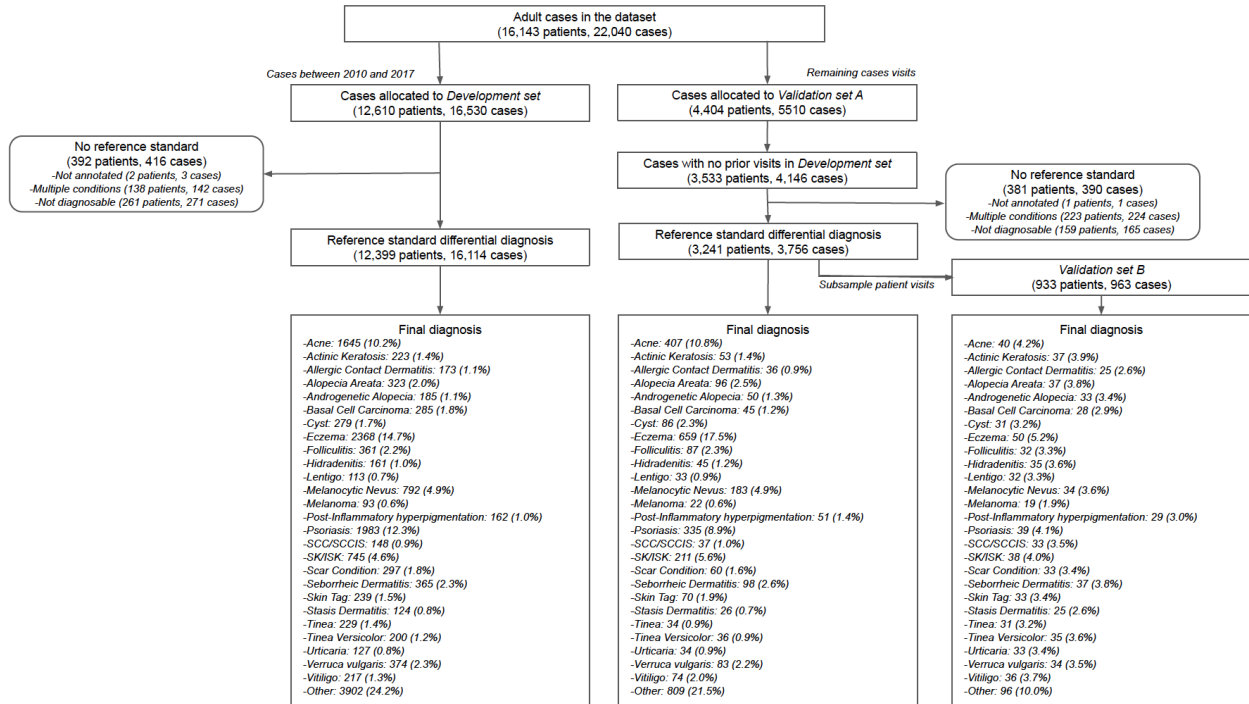

**Supplementary Fig. 1 | STARD diagram illustrating the flow of cases used in this work. Patient counts do not add up perfectly because removal of cases only removes patients if no other cases from those patients remain. A small number of cases were not annotated due to technical issues (3 cases in the development set and 1 case in the validation set).**

**a**

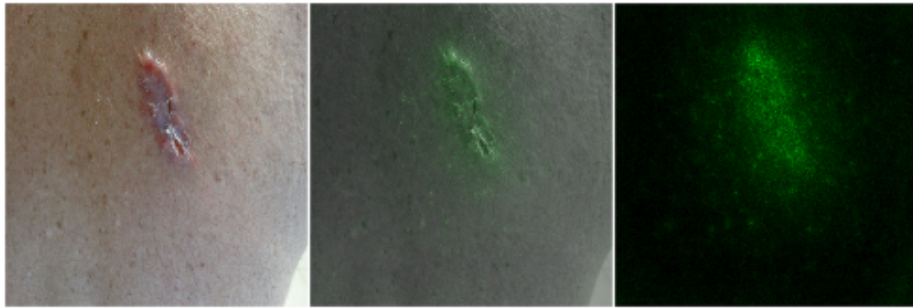

Original Image

Overlay

Integrated Gradient Mask

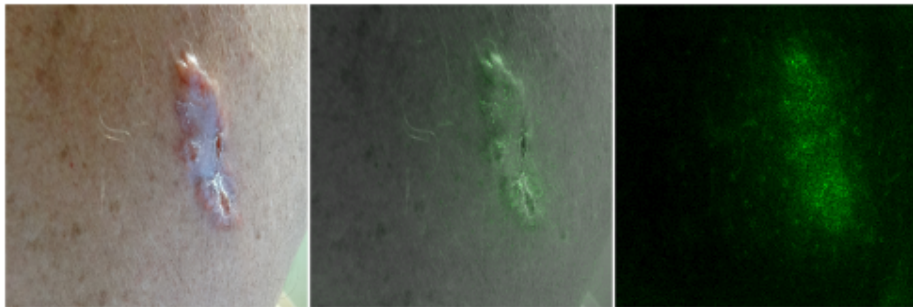

Original Image

Overlay

Integrated Gradient Mask

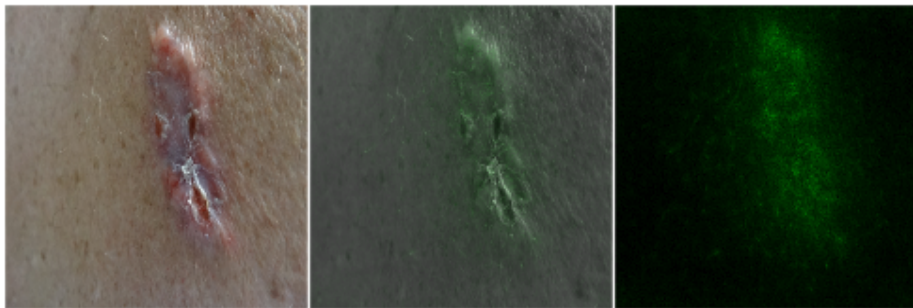

Original Image

Overlay

Integrated Gradient Mask

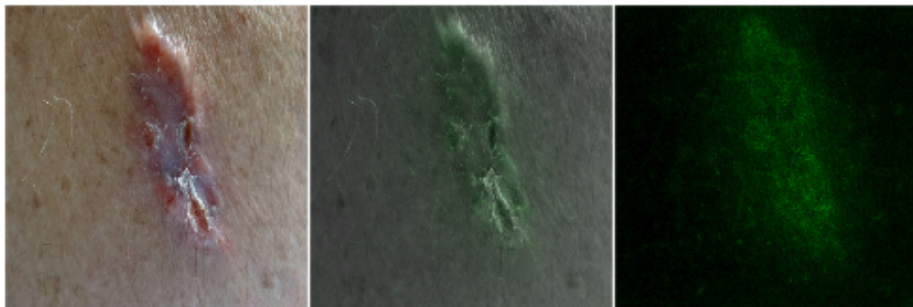

Original Image

Overlay

Integrated Gradient Mask

59 year old (y.o.) Male, White  
 Self-reported skin problem: Rash  
 Duration: More than one year, always present  
 Symptoms: Bothersome in appearance, bleeding, increasing in size  
 Review of system (ROS): No fever/chills (F/C), fatigue, joint pain, mouth sores, or shortness of breath  
 Drugs: Treated by prescription (Rx) or over-the-counter (OTC)  
 Medical history: No history of skin cancer, melanoma, eczema, psoriasis, or biopsy  
 Family history: Psoriasis  
 Drug allergies: None  
 Medication: None  
 Follow-up case?: No

| Reference standard | DLS (top 3) | DLS (growth subgroup) | NP (missed) | NP (missed) | PCP (tied 1 <sup>st</sup> diagnosis) | PCP (missed) | Derm | Derm |
|--------------------|-------------|-----------------------|-------------|-------------|--------------------------------------|--------------|------|------|
|--------------------|-------------|-----------------------|-------------|-------------|--------------------------------------|--------------|------|------|

|                                       |                                                              |                                     |                                                    |                                             |                                 |           |     |     |
|---------------------------------------|--------------------------------------------------------------|-------------------------------------|----------------------------------------------------|---------------------------------------------|---------------------------------|-----------|-----|-----|
| BCC;<br>SCC/SCCIS /<br>Scar condition | BCC: 0.57;<br>Scar condition:<br>0.29;<br>SCC/SCCIS:<br>0.07 | Malignant:<br>0.69;<br>Benign: 0.00 | Other<br>(hypertrophic<br>skin);<br>Scar condition | AK;<br>Other (skin<br>lesion);<br>Psoriasis | BCC /<br>SCC/SCCIS;<br>Melanoma | Psoriasis | BCC | BCC |
|---------------------------------------|--------------------------------------------------------------|-------------------------------------|----------------------------------------------------|---------------------------------------------|---------------------------------|-----------|-----|-----|

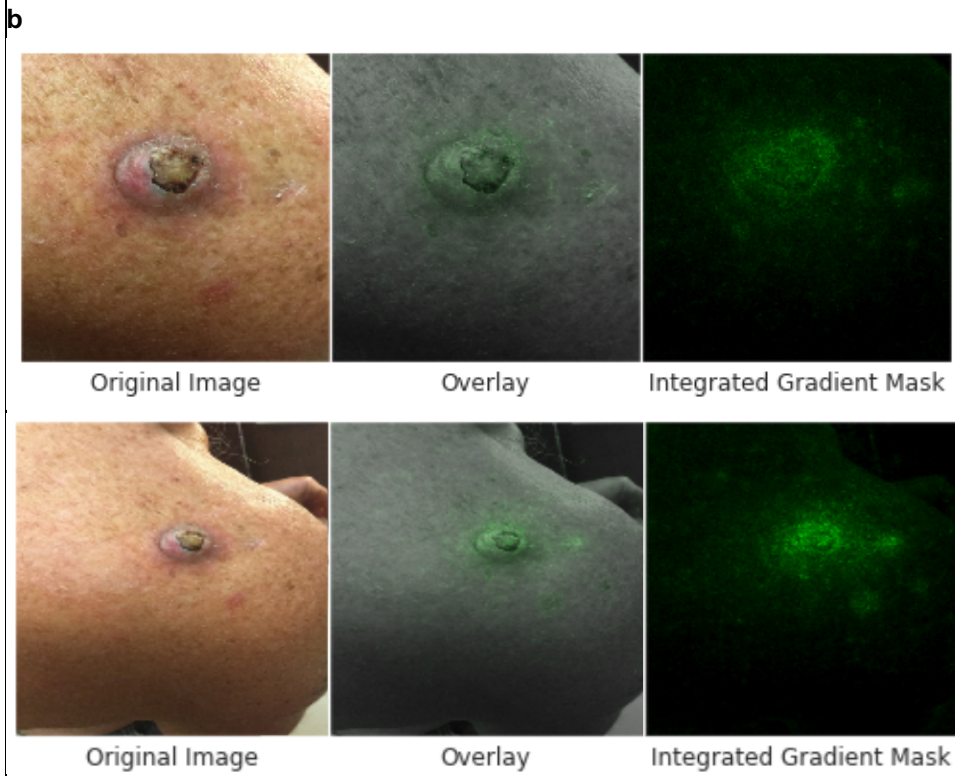

63 y.o. Male  
 Self-reported skin problem: Growth or Mole  
 Duration: Three to twelve months, always present  
 Symptoms: Increasing in size, itching, burning, painful  
 ROS: No F/C, fatigue, joint pain, mouth sores, or shortness of breath  
 Drugs: Treated by Rx or OTC  
 Medical history: No history of skin cancer, melanoma, eczema, psoriasis, or biopsy  
 Family history: Skin cancer  
 Drug allergies: None  
 Medication: None  
 Follow-up case?: No

| Reference standard | DLS (top 3)                                   | DLS (growth subgroup)               | NP (2 <sup>nd</sup> diagnosis) | NP (tied 1 <sup>st</sup> diagnosis)        | PCP (missed)    | PCP (missed)     | Derm              | Derm      |
|--------------------|-----------------------------------------------|-------------------------------------|--------------------------------|--------------------------------------------|-----------------|------------------|-------------------|-----------|
| SCC/SCCIS;<br>BCC  | SCC/SCCIS:<br>0.69;<br>BCC: 0.19;<br>AK: 0.07 | Malignant:<br>0.93;<br>Benign: 0.07 | BCC;<br>SCC/SCCIS;<br>Melanoma | Other (skin lesion) /<br>SCC/SCCIS;<br>BCC | Cannot diagnose | Other (pyoderma) | SCC/SCCIS;<br>BCC | SCC/SCCIS |

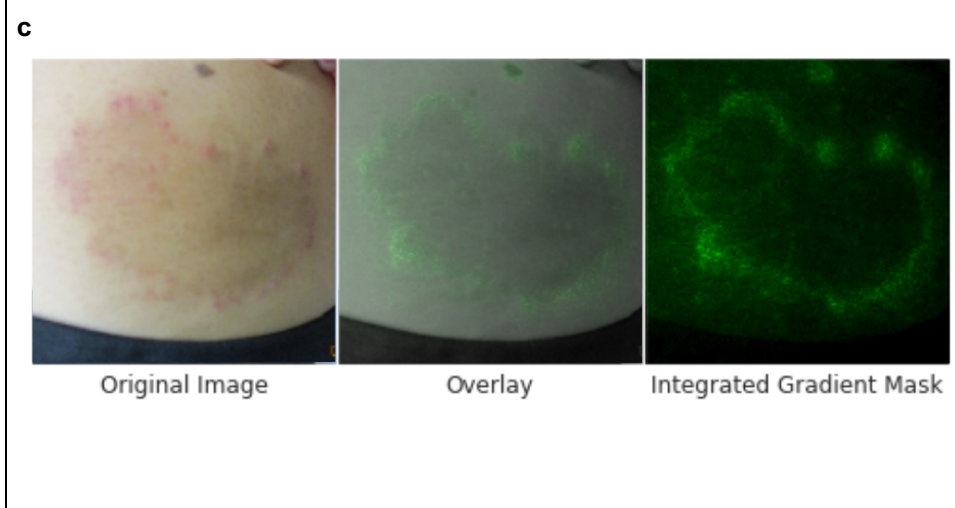

61 y.o. Female, Hispanic or Latino  
 Self-reported skin problem: Rash  
 Duration: One to four weeks, always present  
 Symptoms: Itching  
 ROS: No F/C, fatigue, joint pain, mouth sores, or shortness of breath  
 Drugs: Treated by Rx or OTC  
 Medical history: No history of skin cancer, melanoma, eczema, psoriasis, or biopsy  
 Family history: Skin cancer  
 Drug allergies: None  
 Medication: None

|                                                                                    |                                                                                      |                                                       |                                                              |                                        |                                            |                     |                                                                                                                                                                                                                                                                                                                                                                                                                                                                                                    |             |  |
|------------------------------------------------------------------------------------|--------------------------------------------------------------------------------------|-------------------------------------------------------|--------------------------------------------------------------|----------------------------------------|--------------------------------------------|---------------------|----------------------------------------------------------------------------------------------------------------------------------------------------------------------------------------------------------------------------------------------------------------------------------------------------------------------------------------------------------------------------------------------------------------------------------------------------------------------------------------------------|-------------|--|
| 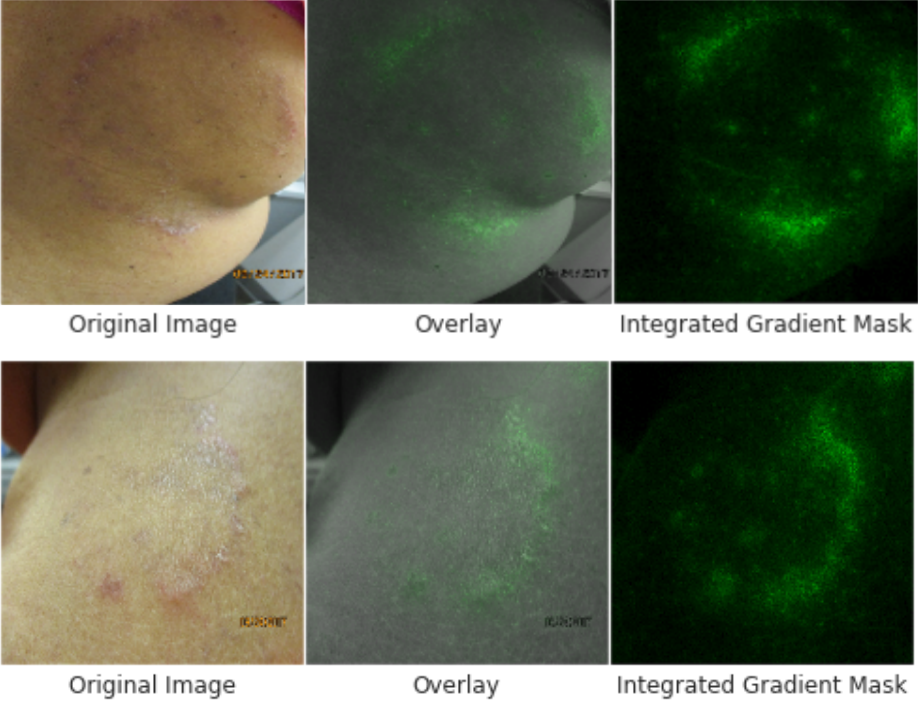 |                                                                                      |                                                       |                                                              |                                        |                                            | Follow-up case?: No |                                                                                                                                                                                                                                                                                                                                                                                                                                                                                                    |             |  |
| <b>Reference standard</b>                                                          | <b>DLS (top 3)</b>                                                                   | <b>DLS (erythematous and papulosquamous subgroup)</b> | <b>NP (missed)</b>                                           | <b>NP (missed)</b>                     | <b>PCP (tied 1<sup>st</sup> diagnosis)</b> | <b>PCP (missed)</b> | <b>Derm</b>                                                                                                                                                                                                                                                                                                                                                                                                                                                                                        | <b>Derm</b> |  |
| Tinea                                                                              | Tinea: 0.68;<br>Eczema: 0.14;<br>Other: 0.03                                         | Infectious: 0.80;<br>Non-infectious: 0.16             | Eczema /<br>Other (Chronic contact dermatitis);<br>Psoriasis | Other (Generalized granuloma annulare) | Other (Granuloma annulare) /<br>Tinea      | Eczema              | Tinea;<br>Other (Granuloma annulare)                                                                                                                                                                                                                                                                                                                                                                                                                                                               | Tinea       |  |
| <b>d</b>                                                                           |  |                                                       |                                                              |                                        |                                            |                     | <p>29 y.o. Male, Native Hawaiian or Pacific Islander<br/> Duration: Three to twelve months, always present<br/> Symptoms: Bothersome in appearance, increasing in size, itching<br/> ROS: No F/C, fatigue, joint pain, mouth sores, or shortness of breath<br/> Drugs: Treated by Rx or OTC<br/> Medical history: No history of skin cancer, melanoma, eczema, psoriasis, or biopsy<br/> Family history: Skin cancer<br/> Drug allergies: None<br/> Medication: None<br/> Follow-up case?: Yes</p> |             |  |

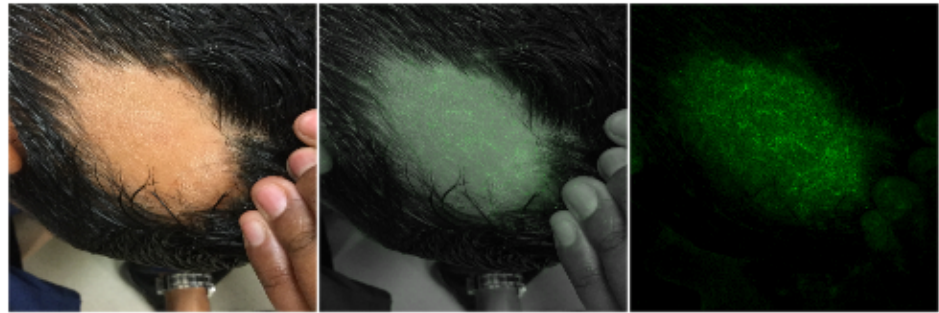

Original Image

Overlay

Integrated Gradient Mask

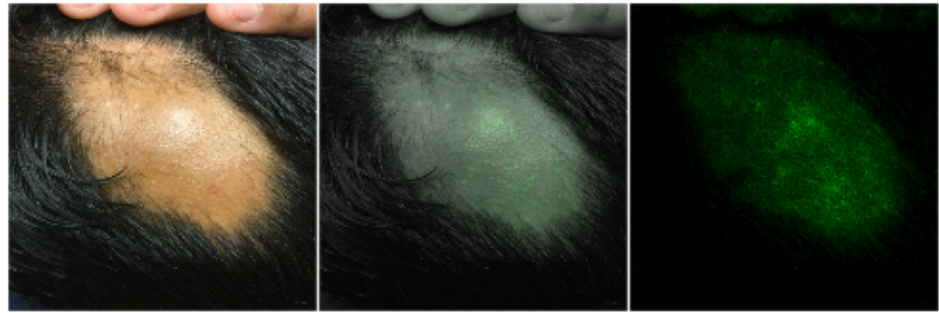

Original Image

Overlay

Integrated Gradient Mask

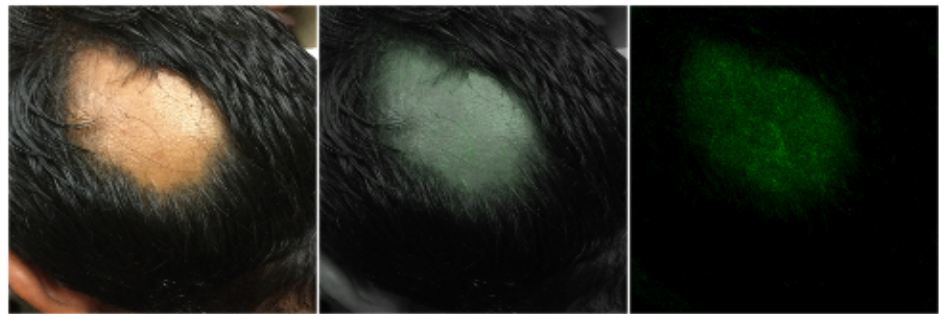

Original Image

Overlay

Integrated Gradient Mask

Patient adhered to treatments: Yes  
 Condition after treatments: Not changed

| Reference standard | DLS (top 3)                            | DLS (hair loss subgroup) | NP (3 <sup>rd</sup> diagnosis)          | NP (missed) | PCP (2 <sup>nd</sup> diagnosis) | PCP | Derm | Derm                            |
|--------------------|----------------------------------------|--------------------------|-----------------------------------------|-------------|---------------------------------|-----|------|---------------------------------|
| AA                 | AA: 0.98;<br>Other: 0.01;<br>AGA: 0.01 | AA: 0.98;<br>AGA: 0.01   | AGA;<br>Other (Alopecia localis);<br>AA | AGA         | AGA;<br>AA                      | AA  | AA   | AA;<br>Other (trichotillomania) |



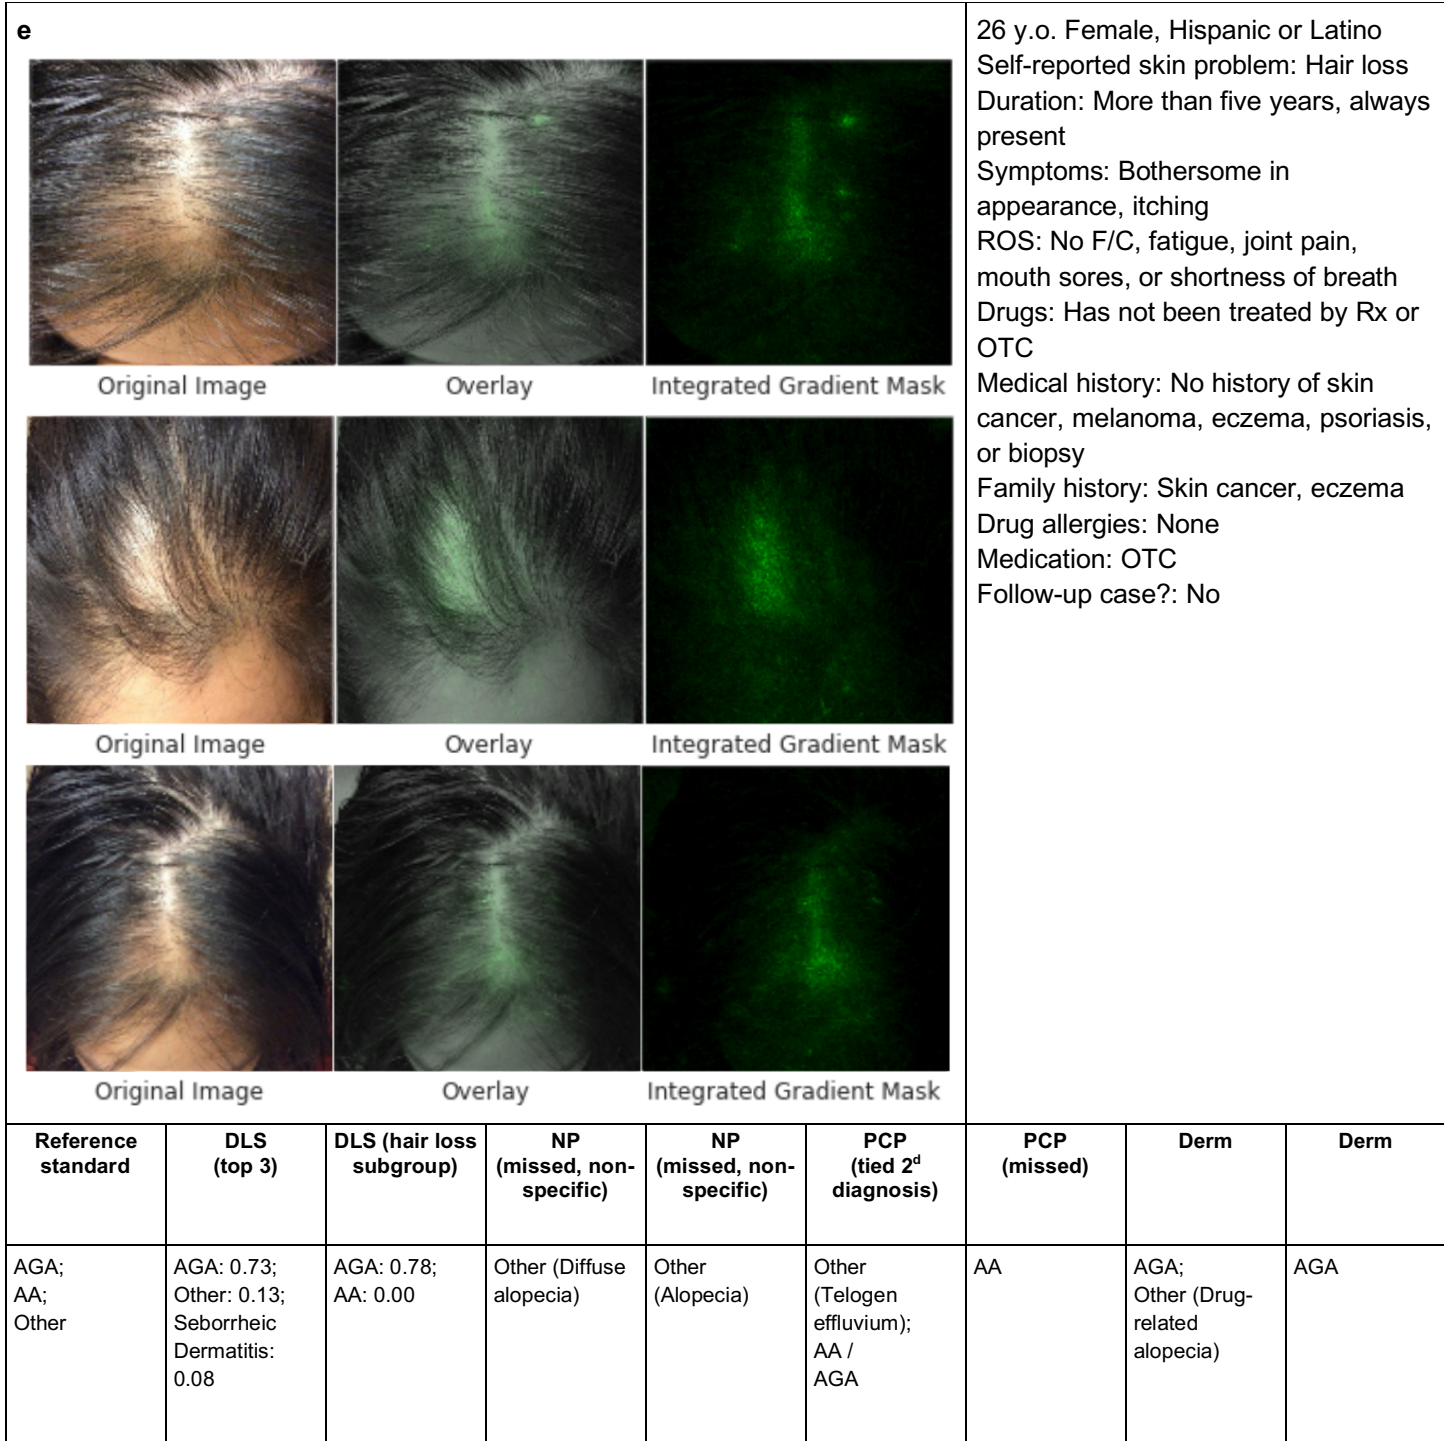

**Supplementary Fig. 2 | All the images and metadata for examples shown in Fig. 3.**

Abbreviations for diagnoses follow those from Fig. 3: basal cell carcinoma (BCC), squamous cell carcinoma (SCC/SCCIS), Alopecia Areata (AA), and Androgenetic Alopecia (AGA). Some images were cropped to zoom in on the condition for clarity.

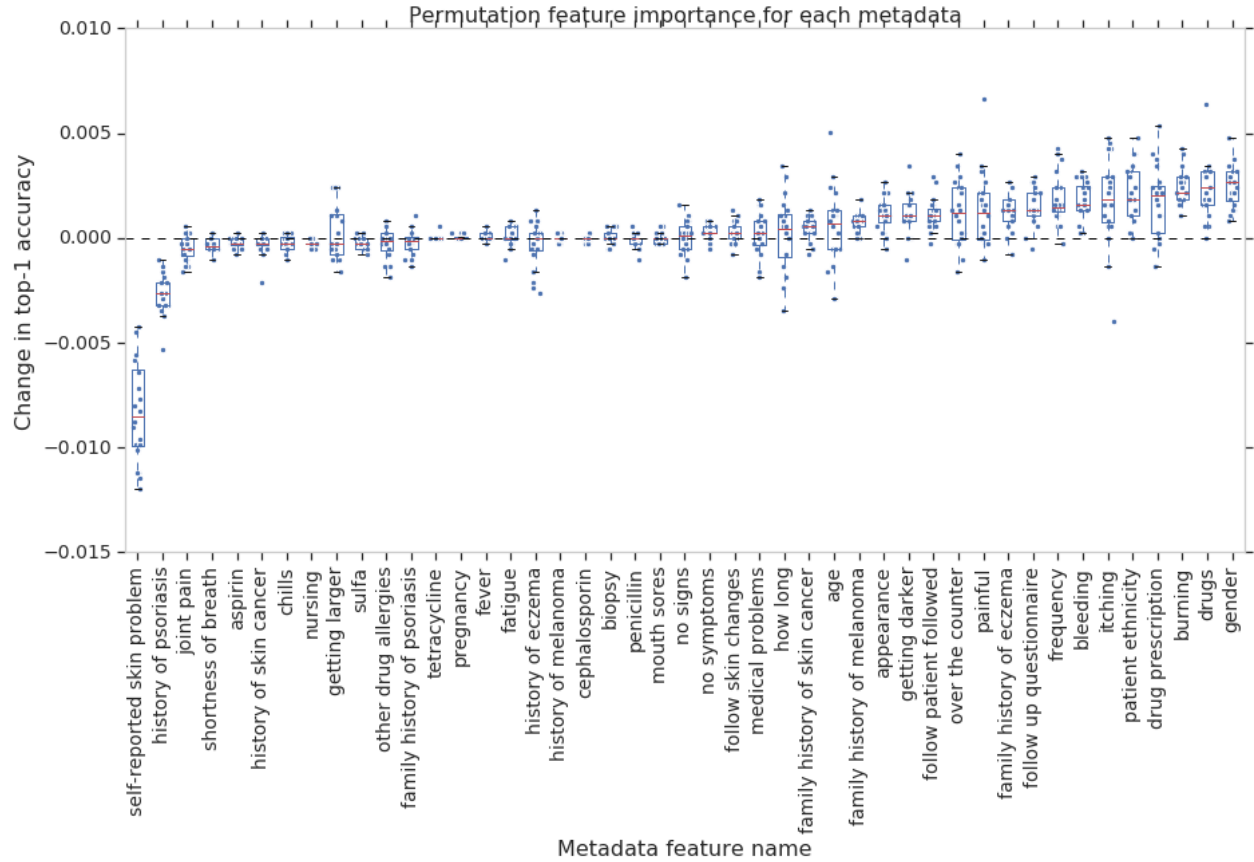

**Supplementary Fig. 3 | Importance of each individual clinical metadata to the deep learning system (DLS).** For each clinical metadata, its values are permuted across validation set A examples, and the effect of this permutation on the top-1 accuracy using the same trained DLS are shown. Boxplot meanings are identical to Fig. 4a (which shows only the top 10 features here).

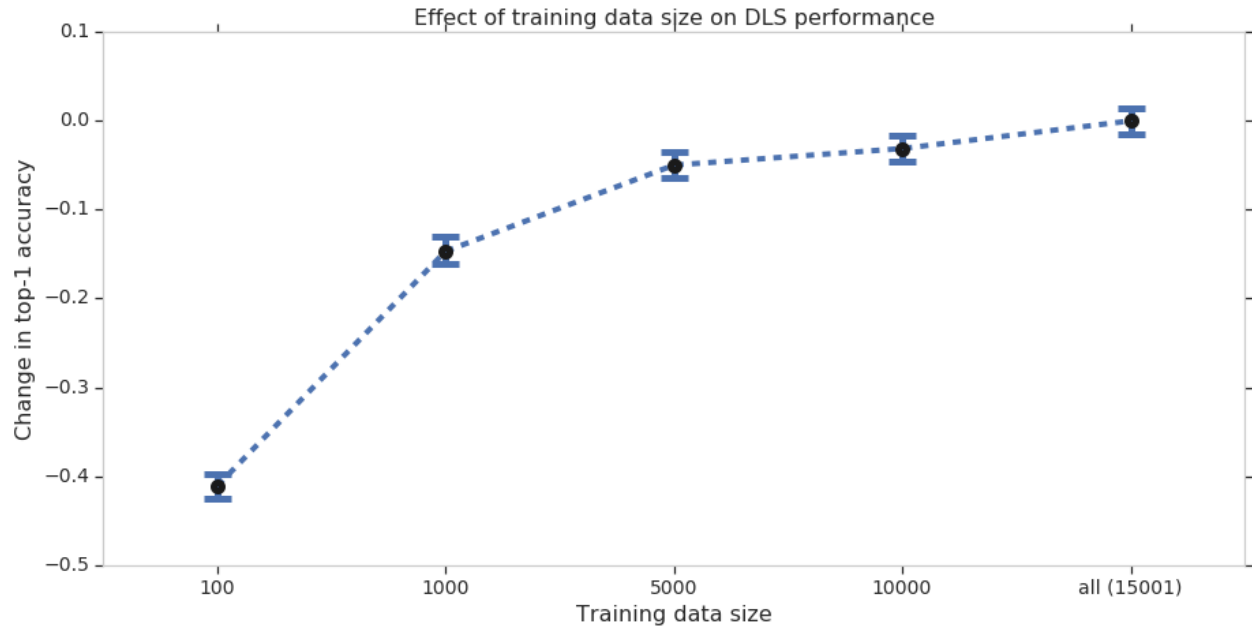

**Supplementary Fig. 4 | Effect of training dataset size (excluding tune set) on the performance of the deep learning system (DLS).** For each experiment, a random subset of the cases was used for training. This DLS was then evaluated on the validation set A and its change in the top-1 accuracy relative to the original DLS (trained with all available training data) is shown. Error bars indicate 95% confidence intervals across all cases in validation set A (n=3,756).

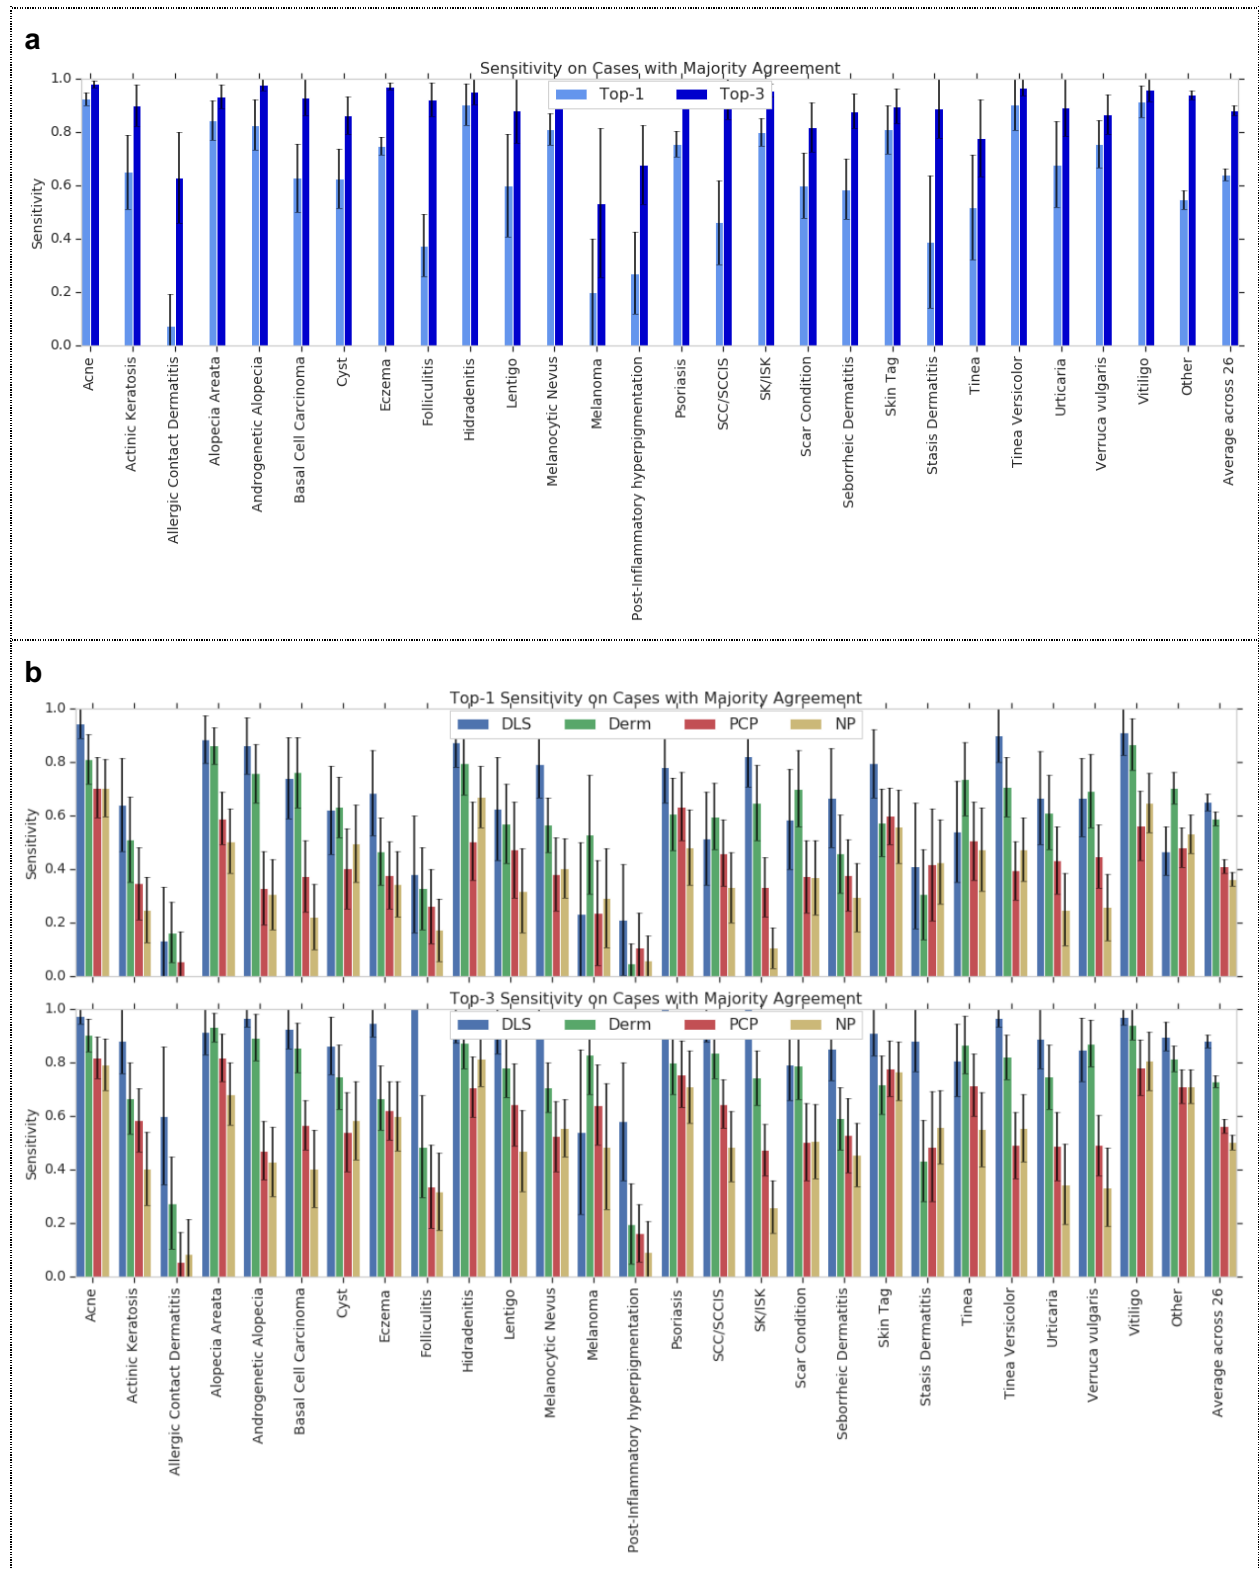

**Supplementary Fig. 5 | Performance of the deep learning system (DLS) and clinicians in cases where at least two out of the three dermatologists determining the reference standard agreed on the primary diagnosis, broken down for each of the 26 categories of skin conditions. a, Top-1 and top-3 sensitivity of the DLS on validation set A (n=3,756). b,**

Top-1 and top-3 sensitivity of the DLS and three types of clinicians: dermatologists (Derm), primary care physicians (PCP), and nurse practitioners (NP) on validation set B (n=963). The number of cases per condition are presented in Supplementary Table 6. The rightmost columns indicate the average sensitivity for the 26 conditions. Error bars indicate 95% confidence intervals (see Statistical Analysis).

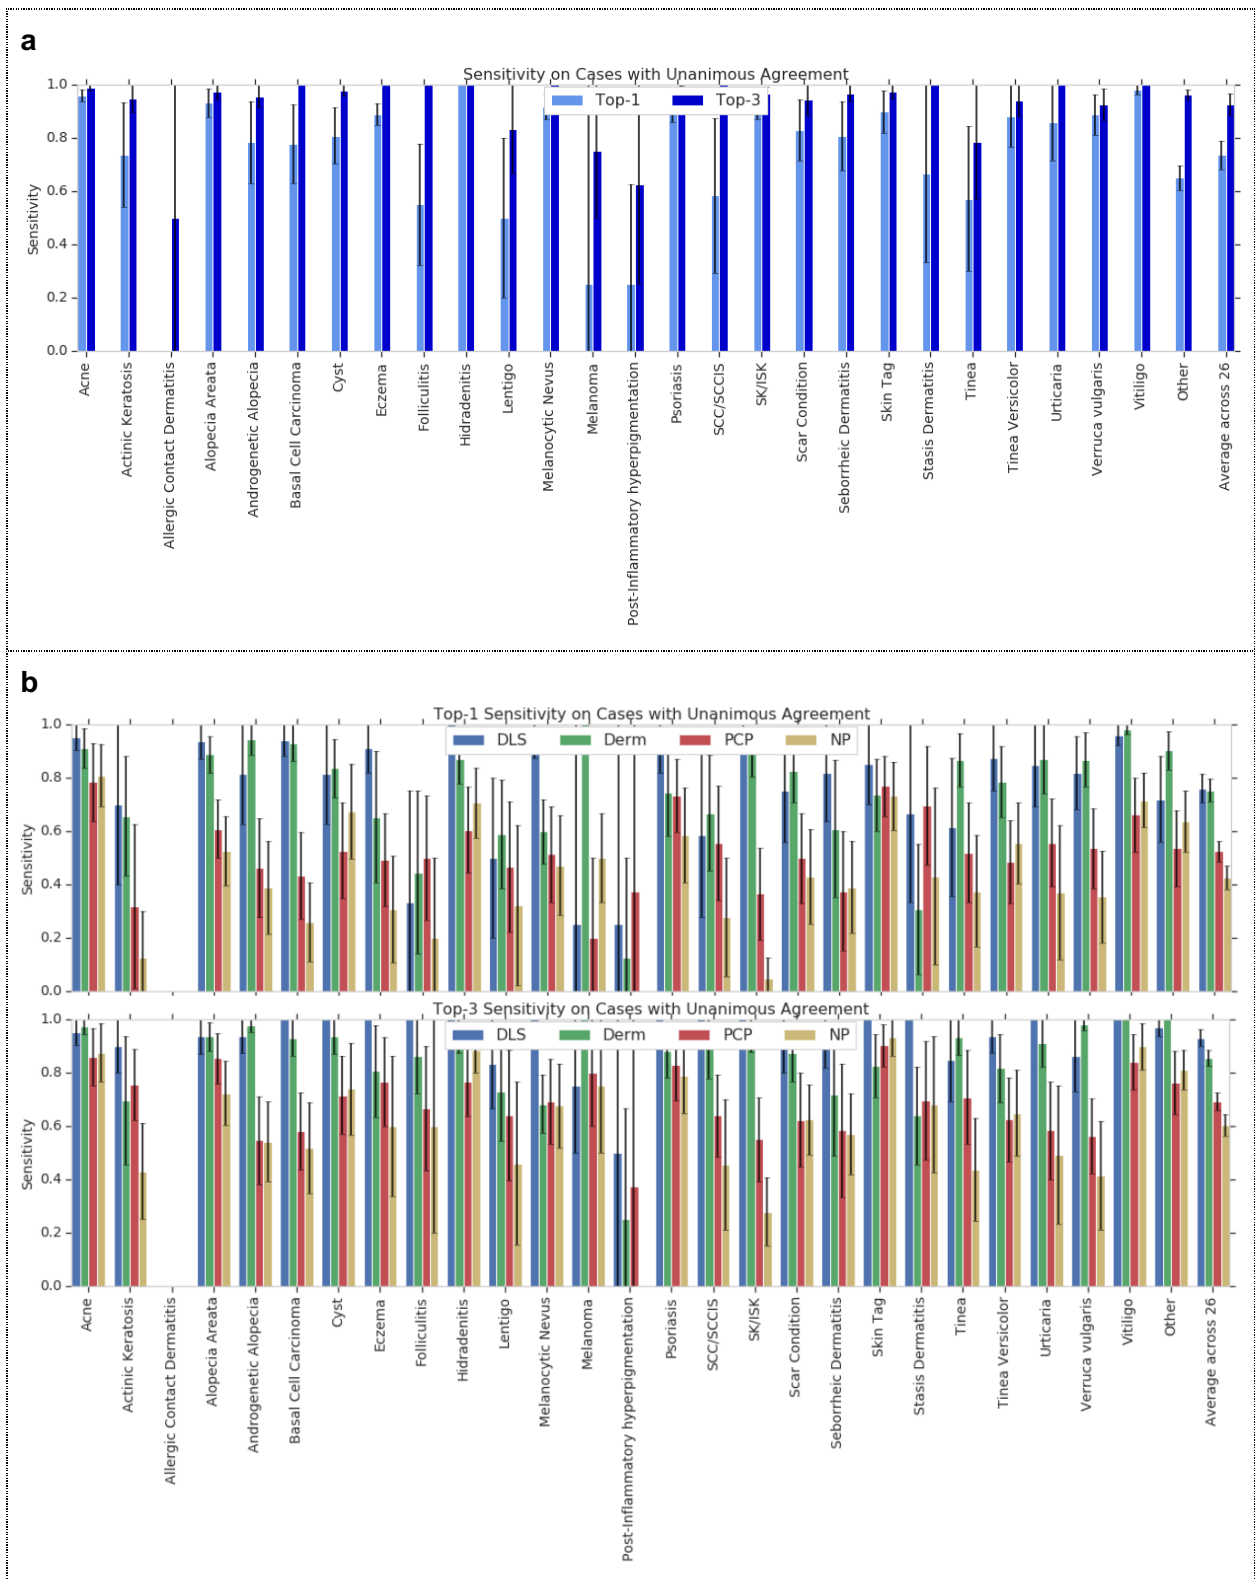

**Supplementary Fig. 6 | Performance of the deep learning system (DLS) and clinicians in cases where all three dermatologists determining the reference standard agreed on the primary diagnosis, broken down for each of the 26 categories of skin conditions. a, Top-1**

and top-3 sensitivity of the DLS on validation set A (n=3,756). **b**, Top-1 and top-3 sensitivity of the DLS and three types of clinicians: dermatologists (Derm), primary care physicians (PCP), and nurse practitioners (NP) on validation set B (n=963). The number of cases per condition are presented in Supplementary Table 6. The empty bars for the DLS and all clinicians for allergic contact dermatitis are due to the lack of cases that achieved full consensus for that condition. The rightmost columns indicate the average sensitivity for the 26 conditions. Error bars indicate 95% confidence intervals (see Statistical Analysis).

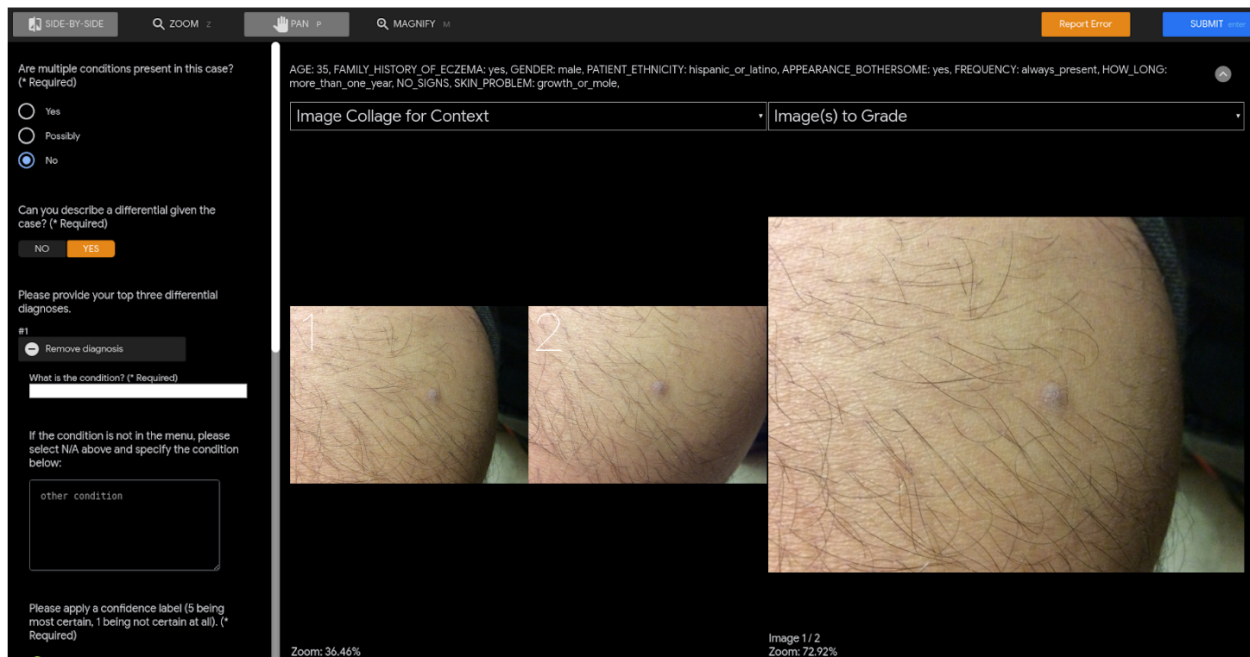

**Supplementary Fig. 7 | Labeling tool interface that was designed to present all information that would be available in a teledermatology case.** Questions prompts (Supplementary Table 9) are displayed in the left panel, whereas clinical metadata (Supplementary Table 1) are shown in the top right panel and images (up to six per case) are shown in the bottom right panel. Any image could be panned, zoomed, and magnified for closer review. The tool did not enforce any time constraint.



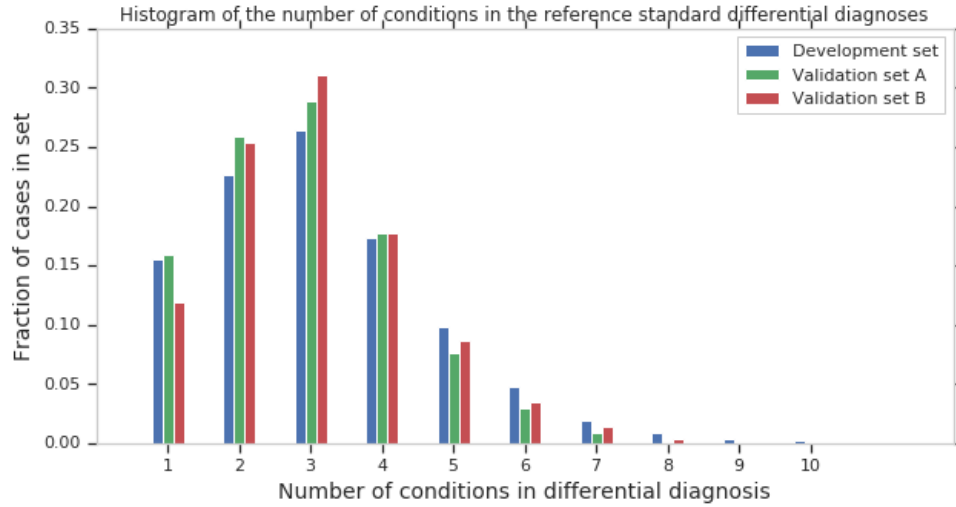

**Supplementary Fig. 8 | Histogram of the number of conditions in the reference standard differential diagnoses.** Within each set (development set:  $n=16,114$ ; validation set A:  $n=3,756$ ; and validation set B:  $n=963$ ), the differential diagnoses has a 25<sup>th</sup> percentile length of 2 and a 75<sup>th</sup> percentile length of 3. The median length was slightly different at 2, 2, 3 for the development set, validation set A, and validation set B, respectively.

**a**

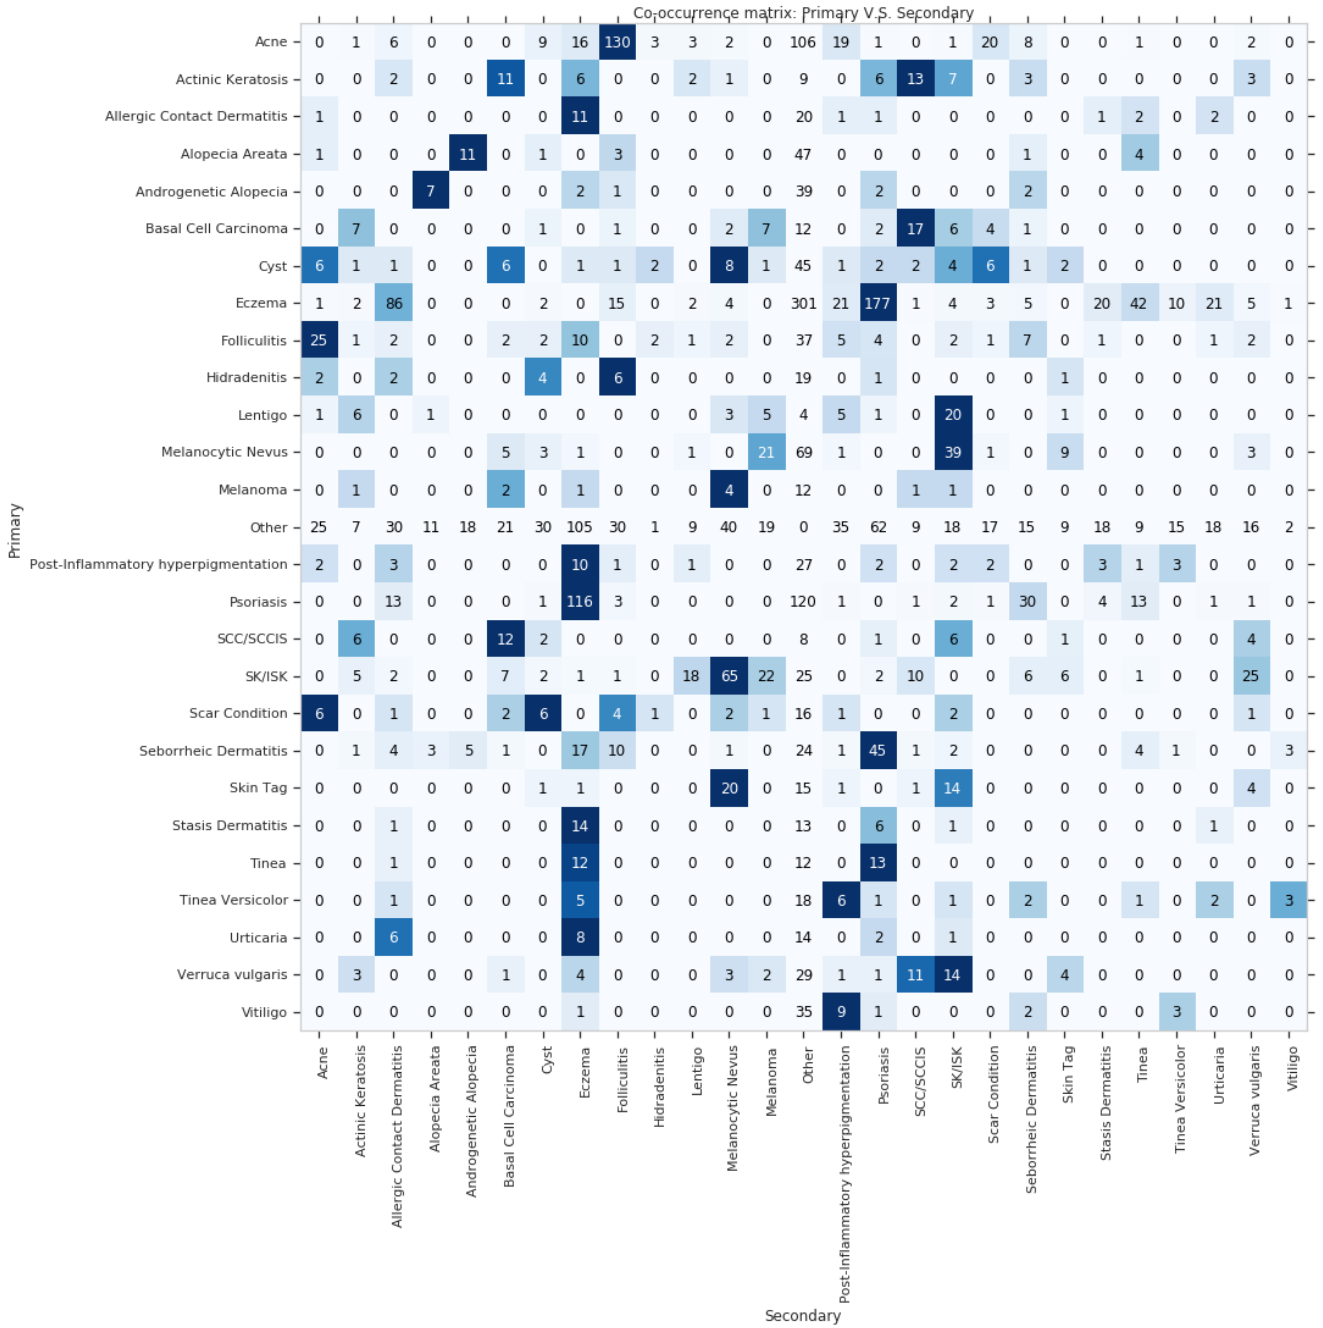

**b**

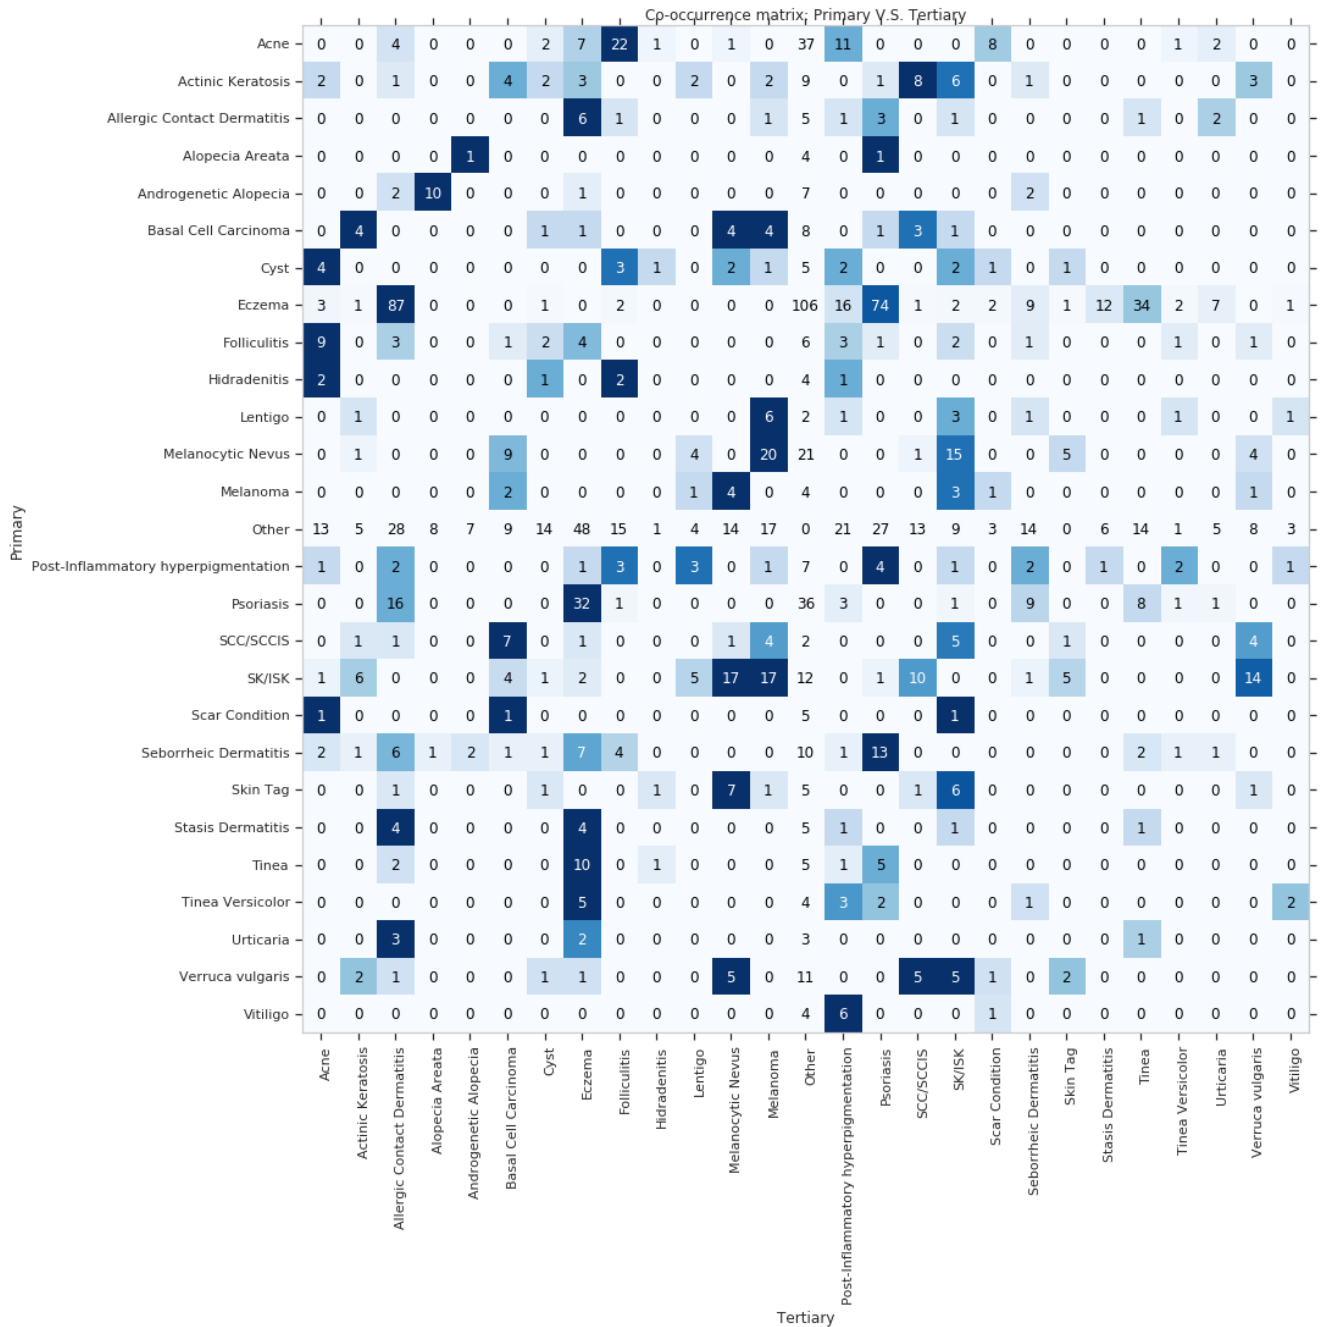

**Supplementary Fig. 9 | Relationship between the primary, secondary, and tertiary diagnoses in the reference standard differential diagnosis in validation set A (n=3,756).** a, Co-occurrence matrix representing the secondary diagnosis for each primary diagnosis. b, Co-occurrence matrix representing the tertiary diagnosis for each primary diagnosis. Eczema and psoriasis frequently appear together in the differential, and the same applies for other pairs like eczema and tinea, melanocytic nevus and Seborrheic keratosis / irritated seborrheic keratosis

(SK/ISK), and acne and folliculitis. These pairs share visual similarities which can account for their co-occurrence in the same differential diagnosis.

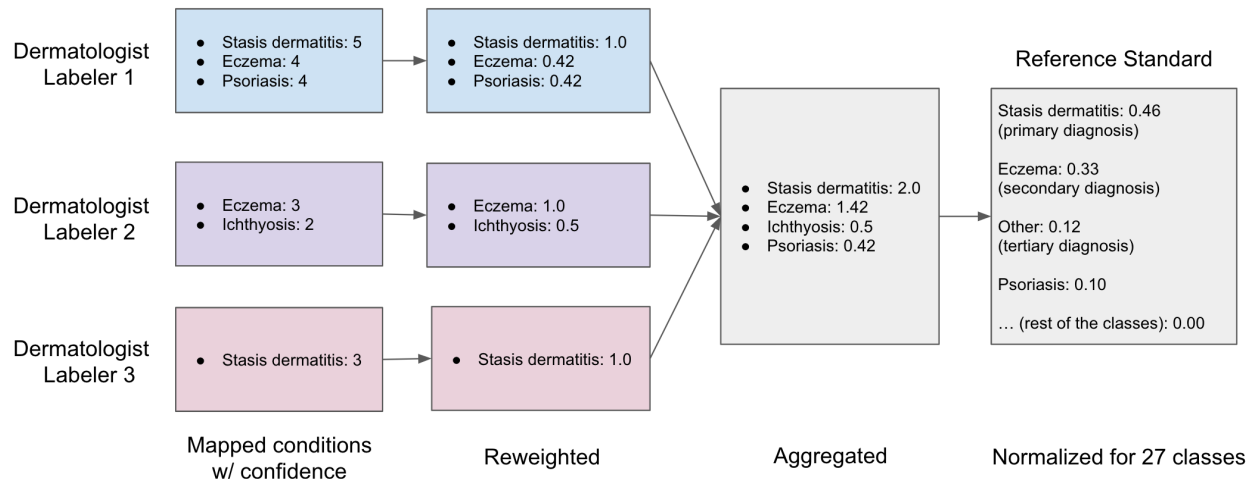

**Supplementary Fig. 10 | Illustration of the establishment of reference standard differential diagnosis.** In this example, each of the three dermatologists reviewed the case independently and provided a list of diagnoses, each with a confidence value ranging from 1 to 5. Weight for each diagnosis (mapped to the 419421 conditionslist) was determined as the inverse of the rank within each labeler. For the first labeler, since there was a tie between eczema and psoriasis, weights for those were adjusted to evenly distribute between these two ( $(\frac{1}{2} + \frac{1}{3}) / 2 = 0.42$ ). Answers from different labelers were then aggregated by summing up the weights, before limiting the skin condition classes to 27 and normalizing their weights to sum to 1.

## Supplementary Tables

**Supplementary Table 1 | Clinical metadata used in this study**

| Name                                         | Description                                                          | Possible values                                                                                                                                                                                                                                                           |
|----------------------------------------------|----------------------------------------------------------------------|---------------------------------------------------------------------------------------------------------------------------------------------------------------------------------------------------------------------------------------------------------------------------|
| <b>Self-reported demographic information</b> |                                                                      |                                                                                                                                                                                                                                                                           |
| Age                                          | The age of the patient in years, at the time the case was submitted. | A float value ranging from 18 to 90. Values larger than 90 are capped at 90.                                                                                                                                                                                              |
| Sex                                          | The sex of the patient.                                              | One of: [Female   Male   Other   Unknown]                                                                                                                                                                                                                                 |
| Race and ethnicity                           | The race/ethnicity of the patient.                                   | One of: [American Indian or Alaska Native   Asian   Black or African American   Hispanic or Latino   Native Hawaiian or Pacific Islander   White   Neither Hispanic Nor Latino   Not specified   Unknown]                                                                 |
| <b>History of the present illness</b>        |                                                                      |                                                                                                                                                                                                                                                                           |
| Self-reported skin problem                   | The high level skin problem the patient is seeking help for.         | One of: [Acne   Growth or mole   Hair loss   Hair or nail problem   Hair problem   Nail problem   Pigmentary problem   Rash   Other   Unknown]                                                                                                                            |
| Symptoms                                     | Any symptoms perceived by the patient.                               | A list of 8 symptoms (bothersome in appearance, bleeding, increasing in size, darkening, itching, burning, painful, none of the above) with each symptom being one of: [Yes   No   Unknown].                                                                              |
| Signs                                        | Any medical signs perceived by the patient.                          | A list of 7 signs (fever, chills, fatigue, joint pain, mouth sores, shortness of breath, none of the above) with each sign being one of [Yes   No   Unknown].                                                                                                             |
| Duration                                     | The time that the skin problem has persisted.                        | One of: [One day   Less than one week   One week   Two weeks   One to four weeks   One month   One to three months   Three months   Three to twelve months   Six months   One year   More than one year   More than five years   Since childhood   Since birth   Unknown] |
| Frequency                                    | Frequency of occurrence of the skin problem.                         | One of: [Always present   Comes and goes   Unknown]                                                                                                                                                                                                                       |
| <b>Past medical history</b>                  |                                                                      |                                                                                                                                                                                                                                                                           |

|                                 |                                                                                          |                                                                                                                                        |
|---------------------------------|------------------------------------------------------------------------------------------|----------------------------------------------------------------------------------------------------------------------------------------|
| Personal history                | Personal medical history.                                                                | A list of four aspects of the personal history (skin cancer, melanoma, eczema, psoriasis) with each being one of [Yes   No   Unknown]. |
| Family history                  | Family medical history.                                                                  | A list of four aspects of the family history (skin cancer, melanoma, eczema, psoriasis) with each being one of [Yes   No   Unknown].   |
| <b>Patient state</b>            |                                                                                          |                                                                                                                                        |
| Allergy                         | Medications the patient is allergic to.                                                  | A list of 6 allergies (penicillin, cephalosporin, sulfa, tetracycline, aspirin, other) with each being one of [Yes   No   Unknown].    |
| Drug                            | If the patient is currently taking any medications.                                      | One of [Yes   No   Unknown].                                                                                                           |
| Pregnancy                       | If the patient is pregnant.                                                              | One of [Yes   No   Unknown].                                                                                                           |
| Nursing                         | If the patient is nursing.                                                               | One of [Yes   No   Unknown].                                                                                                           |
| Medical problem                 | Whether the patient currently has any medical problems.                                  | One of [Yes   No   Unknown].                                                                                                           |
| <b>Previous treatment state</b> |                                                                                          |                                                                                                                                        |
| Follow-up case                  | If this is a follow up case.                                                             | One of [Yes   No   Unknown].                                                                                                           |
| Biopsy                          | If there has been a previous biopsy.                                                     | One of [Yes   No   Unknown].                                                                                                           |
| Past medication                 | Whether the patient used medications for the skin problem.                               | A list of two past medications (prescription drugs, over the counter drugs) with each being one of [Yes   No   Unknown].               |
| Patient adhered to treatments   | Whether the patient is following the treatment If the patient received treatment before. | One of: [No   Partially   Yes   Unknown]                                                                                               |
| Condition after treatments      | Progression of the skin problem If the patient received treatment before.                | One of: [Improved   Not changed   Worsened   Unknown]                                                                                  |

**Supplementary Table 2 | Performance of the deep learning system (DLS) and different types of clinicians, on validation set A and validation set B.** The reference standard differential diagnoses for each case was determined by the votes of a panel of three board-certified dermatologists. Performance was measured by the agreement of the top-1 and top-3 diagnoses with the primary diagnosis of the panel. The average overlap (AO) directly compares the DLS or clinician-provided ranked differential diagnoses with the panel’s full differential diagnoses. The AO ranges from 0 to 1, with higher values indicating better agreement. Numbers in square braces indicate 95% confidence intervals (see Statistical Analysis). Bold indicates the highest value within each column for validation set B.

| Dataset                                            | Grader | Top-1                       |                             | Top-3                       |                             | Average Overlap (AO)        |
|----------------------------------------------------|--------|-----------------------------|-----------------------------|-----------------------------|-----------------------------|-----------------------------|
|                                                    |        | Accuracy                    | Average Sensitivity         | Accuracy                    | Average Sensitivity         |                             |
| Validation set A (n=3,756)                         | DLS    | 0.71<br>[0.69, 0.72]        | 0.58<br>[0.56, 0.60]        | 0.93<br>[0.92, 0.94]        | 0.83<br>[0.81, 0.85]        | 0.67<br>[0.67, 0.68]        |
| Validation set B (enriched subset of set A, n=963) | DLS    | <b>0.66</b><br>[0.64, 0.69] | <b>0.56</b><br>[0.54, 0.59] | <b>0.90</b><br>[0.88, 0.92] | <b>0.82</b><br>[0.79, 0.84] | <b>0.63</b><br>[0.62, 0.65] |
|                                                    | Derm   | 0.63<br>[0.60, 0.65]        | 0.51<br>[0.49, 0.54]        | 0.75<br>[0.72, 0.77]        | 0.64<br>[0.61, 0.66]        | 0.58<br>[0.56, 0.59]        |
|                                                    | PCP    | 0.44<br>[0.42, 0.47]        | 0.35<br>[0.33, 0.38]        | 0.60<br>[0.58, 0.62]        | 0.49<br>[0.47, 0.52]        | 0.46<br>[0.44, 0.47]        |
|                                                    | NP     | 0.40<br>[0.38, 0.43]        | 0.32<br>[0.30, 0.34]        | 0.55<br>[0.53, 0.58]        | 0.45<br>[0.42, 0.47]        | 0.43<br>[0.41, 0.44]        |



**Supplementary Table 3 | Performance of the deep learning system (DLS), sliced by self-reported demographic information (including age, sex, race and ethnicity), and Fitzpatrick skin type on validation set A (n=3,756).** Metrics used are identical to the ones in Supplementary Table 2. Numbers in square braces indicate 95% confidence intervals (see Statistical Analysis).

| Break down         | Category                                      | Top-1                |                        | Top-3                |                        | Average Overlap (AO) |
|--------------------|-----------------------------------------------|----------------------|------------------------|----------------------|------------------------|----------------------|
|                    |                                               | Accuracy             | Average Sensitivity    | Accuracy             | Average Sensitivity    |                      |
| Age                | [18, 30)<br>(29.5%)                           | 0.76<br>[0.73, 0.78] | 0.55<br>[0.52, 0.62]   | 0.95<br>[0.93, 0.96] | 0.80<br>[0.76, 0.87]   | 0.71<br>[0.69, 0.72] |
|                    | [30, 40)<br>(19.9%)                           | 0.70<br>[0.66, 0.73] | 0.51<br>[0.47, 0.58]   | 0.93<br>[0.91, 0.94] | 0.79<br>[0.73, 0.84]   | 0.67<br>[0.65, 0.69] |
|                    | [40, 50)<br>(17.3%)                           | 0.70<br>[0.66, 0.73] | 0.59<br>[0.54, 0.65]   | 0.93<br>[0.91, 0.94] | 0.84<br>[0.80, 0.88]   | 0.67<br>[0.65, 0.69] |
|                    | [50, 60)<br>(18.6%)                           | 0.68<br>[0.65, 0.72] | 0.61<br>[0.54, 0.65]   | 0.92<br>[0.90, 0.94] | 0.81<br>[0.76, 0.85]   | 0.66<br>[0.64, 0.68] |
|                    | [60, 90]<br>(14.6%)                           | 0.66<br>[0.62, 0.70] | 0.47<br>[0.41, 0.53]   | 0.93<br>[0.91, 0.95] | 0.80<br>[0.74, 0.85]   | 0.65<br>[0.63, 0.67] |
| Sex                | Female<br>(63.1%)                             | 0.71<br>[0.69, 0.73] | 0.58<br>[0.55, 0.61]   | 0.93<br>[0.92, 0.94] | 0.83<br>[0.81, 0.86]   | 0.67<br>[0.66, 0.68] |
|                    | Male<br>(36.9%)                               | 0.71<br>[0.68, 0.73] | 0.60<br>[0.56, 0.64]   | 0.93<br>[0.91, 0.94] | 0.83<br>[0.80, 0.86]   | 0.68<br>[0.66, 0.69] |
| Race and ethnicity | American Indian or Alaska Native<br>(1.1%)    | 0.64<br>[0.50, 0.79] | 0.54**<br>[0.41, 0.73] | 0.93<br>[0.86, 1.00] | 0.92**<br>[0.81, 1.00] | 0.68<br>[0.61, 0.75] |
|                    | Asian<br>(12.6%)                              | 0.75<br>[0.71, 0.79] | 0.56<br>[0.49, 0.65]   | 0.95<br>[0.93, 0.97] | 0.85<br>[0.79, 0.90]   | 0.68<br>[0.66, 0.70] |
|                    | Black or African American<br>(6.1%)           | 0.70<br>[0.63, 0.75] | 0.54<br>[0.46, 0.66]   | 0.95<br>[0.92, 0.97] | 0.78<br>[0.74, 0.90]   | 0.69<br>[0.65, 0.72] |
|                    | Hispanic or Latino<br>(43.4%)                 | 0.71<br>[0.69, 0.73] | 0.55<br>[0.51, 0.59]   | 0.93<br>[0.92, 0.94] | 0.81<br>[0.78, 0.85]   | 0.68<br>[0.67, 0.69] |
|                    | Native Hawaiian or Pacific Islander<br>(1.6%) | 0.70<br>[0.59, 0.82] | 0.58<br>[0.42, 0.69]   | 0.97<br>[0.92, 1.00] | 0.78<br>[0.64, 0.88]   | 0.65<br>[0.59, 0.72] |

|                          |                            |                      |                        |                      |                        |                      |
|--------------------------|----------------------------|----------------------|------------------------|----------------------|------------------------|----------------------|
|                          | White<br>(31.3%)           | 0.69<br>[0.66, 0.72] | 0.60<br>[0.55, 0.63]   | 0.92<br>[0.90, 0.93] | 0.81<br>[0.77, 0.84]   | 0.67<br>[0.66, 0.68] |
|                          | Not<br>specified<br>(3.9%) | 0.70<br>[0.63, 0.77] | 0.57<br>[0.49, 0.68]   | 0.93<br>[0.88, 0.97] | 0.83<br>[0.74, 0.92]   | 0.67<br>[0.63, 0.70] |
| Fitzpatrick<br>skin type | Type I<br>(0.2%)           | 0.44<br>[0.11, 0.78] | 0.58**<br>[0.25, 1.00] | 0.78<br>[0.44, 1.00] | 0.83**<br>[0.67, 1.00] | 0.50<br>[0.40, 0.62] |
|                          | Type II<br>(10.2%)         | 0.71<br>[0.66, 0.75] | 0.61<br>[0.54, 0.69]   | 0.91<br>[0.88, 0.94] | 0.79<br>[0.74, 0.85]   | 0.66<br>[0.63, 0.69] |
|                          | Type III<br>(64.2%)        | 0.71<br>[0.69, 0.73] | 0.60<br>[0.57, 0.62]   | 0.94<br>[0.93, 0.95] | 0.85<br>[0.83, 0.87]   | 0.68<br>[0.67, 0.69] |
|                          | Type IV<br>(19.3%)         | 0.70<br>[0.67, 0.73] | 0.51<br>[0.45, 0.57]   | 0.93<br>[0.91, 0.94] | 0.76<br>[0.70, 0.82]   | 0.68<br>[0.66, 0.70] |
|                          | Type V<br>(2.7%)           | 0.74<br>[0.65, 0.83] | 0.59**<br>[0.48, 0.75] | 0.95<br>[0.90, 0.99] | 0.83**<br>[0.78, 0.98] | 0.69<br>[0.65, 0.74] |
|                          | Type VI<br>(0.0%)          | 1.00*                | 1.00* **               | 1.00*                | 1.00* **               | 0.75*                |
|                          | Unknown<br>(3.4%)          | 0.65<br>[0.55, 0.74] | 0.50<br>[0.42, 0.65]   | 0.94<br>[0.89, 0.98] | 0.83<br>[0.76, 0.94]   | 0.63<br>[0.58, 0.68] |

\* : There was only 1 case labeled as Type VI, so confidence intervals were not meaningful.

\*\* : At least ten of the 26 conditions were absent from this subanalysis, resulting in an ill-defined sensitivity for those conditions and an unreliable estimate for average sensitivity.

**Supplementary Table 4 | Performance of the deep learning system (DLS) and different types of clinicians on the 419-way classification, on validation sets A and B.** The average sensitivity metric was not computed because not all 419 categories had significant representation; missing or rare conditions would skew the numbers. In validation set A for example, 204 unique skin conditions were present as primary diagnoses, and 321 conditions were present as any diagnosis (e.g. secondary, tertiary, etc). Numbers in square braces indicate 95% confidence intervals. Bold indicates the highest value within each column for validation set B.

| Dataset                                                  | Grader | Top-1 accuracy                     | Top-3 accuracy                     | Average Overlap (AO)               |
|----------------------------------------------------------|--------|------------------------------------|------------------------------------|------------------------------------|
| Validation set A<br>(n=3,756)                            | DLS    | 0.67<br>[0.66, 0.69]               | 0.86<br>[0.85, 0.87]               | 0.61<br>[0.60, 0.62]               |
| Validation set B<br>(enriched subset<br>of set A, n=963) | DLS    | <b>0.64</b><br><b>[0.61, 0.67]</b> | <b>0.84</b><br><b>[0.82, 0.86]</b> | <b>0.57</b><br><b>[0.55, 0.59]</b> |
|                                                          | Derm   | 0.61<br>[0.58, 0.63]               | 0.72<br>[0.70, 0.75]               | 0.52<br>[0.51, 0.54]               |
|                                                          | PCP    | 0.42<br>[0.40, 0.45]               | 0.56<br>[0.53, 0.58]               | 0.39<br>[0.38, 0.41]               |
|                                                          | NP     | 0.40<br>[0.37, 0.42]               | 0.51<br>[0.49, 0.54]               | 0.37<br>[0.35, 0.38]               |

**Supplementary Table 5 | Distribution of conditions post biopsy.** Abbreviations per Table 2.

| Data set                   | Malignancy (%) | Basal cell carcinoma (%) | Melanoma (%) | SCC/SCCIS (%) |
|----------------------------|----------------|--------------------------|--------------|---------------|
| Validation set A (n=3,756) | 52 (100%)      | 32 (61.5%)               | 6 (11.5%)    | 14 (26.9%)    |
| Validation set B (n=963)   | 37 (100%)      | 19 (51.3%)               | 5 (13.5%)    | 13 (35.1%)    |

**Supplementary Table 6 | Number of cases per category of skin condition, filtered by different levels of agreement on the primary diagnosis among dermatologists determining the reference standard.**

| Condition name                      | Validation set A |                                                            |                                                         | Validation set B |                                                            |                                                         |
|-------------------------------------|------------------|------------------------------------------------------------|---------------------------------------------------------|------------------|------------------------------------------------------------|---------------------------------------------------------|
|                                     | No. of cases     | No. of cases with agreement by $\geq 2$ dermatologists (%) | No. of cases with agreement by all 3 dermatologists (%) | No. of cases     | No. of cases with agreement by $\geq 2$ dermatologists (%) | No. of cases with agreement by all 3 dermatologists (%) |
| Acne                                | 428              | 381 ( 89.0%)                                               | 267 ( 62.4%)                                            | 47               | 36 (76.6%)                                                 | 21 (44.7%)                                              |
| Actinic Keratosis                   | 62               | 40 ( 64.5%)                                                | 19 ( 30.6%)                                             | 43               | 25 (58.1%)                                                 | 10 (23.3%)                                              |
| Allergic Contact Dermatitis         | 49               | 27 ( 55.1%)                                                | 2 ( 4.1%)                                               | 36               | 15 (41.7%)                                                 | 0 (0.0%)                                                |
| Alopecia Areata                     | 98               | 90 ( 91.8%)                                                | 73 ( 74.5%)                                             | 39               | 35 (89.7%)                                                 | 31 (79.5%)                                              |
| Androgenetic Alopecia               | 56               | 46 ( 82.1%)                                                | 23 ( 41.1%)                                             | 36               | 29 (80.6%)                                                 | 16 (44.4%)                                              |
| Basal Cell Carcinoma                | 48               | 43 ( 89.6%)                                                | 27 ( 56.2%)                                             | 31               | 27 (87.1%)                                                 | 17 (54.8%)                                              |
| Cyst                                | 97               | 80 ( 82.5%)                                                | 47 ( 48.5%)                                             | 37               | 29 (78.4%)                                                 | 16 (43.2%)                                              |
| Eczema                              | 719              | 565 ( 78.6%)                                               | 229 ( 31.8%)                                            | 71               | 38 (53.5%)                                                 | 11 (15.5%)                                              |
| Folliculitis                        | 111              | 64 ( 57.7%)                                                | 20 ( 18.0%)                                             | 43               | 21 (48.8%)                                                 | 6 (14.0%)                                               |
| Hidradenitis                        | 47               | 41 ( 87.2%)                                                | 31 ( 66.0%)                                             | 37               | 32 (86.5%)                                                 | 23 (62.2%)                                              |
| Lentigo                             | 37               | 25 ( 67.6%)                                                | 12 ( 32.4%)                                             | 36               | 29 (74.4%)                                                 | 12 (33.3%)                                              |
| Melanocytic Nevus                   | 194              | 168 ( 86.6%)                                               | 96 ( 49.5%)                                             | 39               | 29 (72.5%)                                                 | 16 (41.0%)                                              |
| Melanoma                            | 27               | 15 ( 55.6%)                                                | 4 ( 14.8%)                                              | 22               | 13 (59.1%)                                                 | 4 (18.2%)                                               |
| Post Inflammatory Hyperpigmentation | 66               | 37 ( 56.1%)                                                | 8 ( 12.1%)                                              | 38               | 19 (50.0%)                                                 | 4 (10.5%)                                               |
| Psoriasis                           | 365              | 316 ( 86.6%)                                               | 199 ( 54.5%)                                            | 49               | 32 (65.3%)                                                 | 22 (44.9%)                                              |
| SCC/SCCIS                           | 39               | 39 (100.0%)                                                | 12 ( 30.8%)                                             | 35               | 33 (94.3%)                                                 | 12 (34.3%)                                              |
| SK/ISK                              | 224              | 203 ( 90.6%)                                               | 118 ( 52.7%)                                            | 44               | 39 (88.6%)                                                 | 22 (50.0%)                                              |
| Scar Condition                      | 69               | 55 ( 79.7%)                                                | 35 ( 50.7%)                                             | 38               | 29 (76.3%)                                                 | 20 (52.6%)                                              |
| Seborrheic Dermatitis               | 112              | 82 ( 73.2%)                                                | 31 ( 27.7%)                                             | 43               | 27 (62.8%)                                                 | 11 (25.6%)                                              |
| Skin Tag                            | 73               | 68 ( 93.2%)                                                | 39 ( 53.4%)                                             | 35               | 34 (97.1%)                                                 | 20 (57.1%)                                              |
| Stasis Dermatitis                   | 30               | 18 ( 60.0%)                                                | 6 ( 20.0%)                                              | 29               | 17 (58.6%)                                                 | 6 (20.7%)                                               |
| Tinea                               | 38               | 27 ( 71.1%)                                                | 14 ( 36.8%)                                             | 35               | 26 (74.3%)                                                 | 13 (37.1%)                                              |
| Tinea Versicolor                    | 37               | 31 ( 83.8%)                                                | 17 ( 45.9%)                                             | 36               | 30 (83.3%)                                                 | 16 (44.4%)                                              |
| Urticaria                           | 39               | 28 ( 71.8%)                                                | 14 ( 35.9%)                                             | 38               | 27 (71.1%)                                                 | 13 (34.2%)                                              |
| Verruca vulgaris                    | 88               | 82 ( 93.2%)                                                | 53 ( 60.2%)                                             | 38               | 33 (86.8%)                                                 | 22 (57.9%)                                              |
| Vitiligo                            | 78               | 70 ( 89.7%)                                                | 51 ( 65.4%)                                             | 38               | 34 (89.5%)                                                 | 25 (65.8%)                                              |
| Other                               | 910              | 844 ( 92.7%)                                               | 389 ( 42.7%)                                            | 139              | 107 (77.0%)                                                | 32 (23.0%)                                              |

**Supplementary Table 7 | Top-1 and top-3 sensitivity averaged across all the skin conditions categories, and with different exclusions on validation set B (n=963).** Allergic Contact Dermatitis (ACD) and Post-inflammatory Hyperpigmentation (PIH) are included in this analysis because of the low sensitivity for these conditions by both the deep learning system (DLS) and the three types of clinicians (dermatologists, Derms; primary care physicians, PCPs; and nurse practitioners, NPs). Bold indicates the highest value within each row and each evaluation metric.

| Conditions included in the average             | Average Top-1 Sensitivity |      |      |      | Average Top-3 Sensitivity |      |      |      |
|------------------------------------------------|---------------------------|------|------|------|---------------------------|------|------|------|
|                                                | DLS                       | Derm | PCP  | NP   | DLS                       | Derm | PCP  | NP   |
| All 27 conditions                              | <b>0.56</b>               | 0.51 | 0.35 | 0.32 | <b>0.82</b>               | 0.64 | 0.49 | 0.45 |
| 26 conditions (excludes "Other")               | <b>0.56</b>               | 0.51 | 0.35 | 0.32 | <b>0.82</b>               | 0.64 | 0.49 | 0.45 |
| 25 conditions (excludes ACD and PIH)           | <b>0.59</b>               | 0.55 | 0.38 | 0.35 | <b>0.84</b>               | 0.68 | 0.54 | 0.49 |
| 24 conditions (excludes ACD, PIH, and "Other") | <b>0.60</b>               | 0.55 | 0.38 | 0.34 | <b>0.84</b>               | 0.68 | 0.53 | 0.48 |

**Supplementary Table 8 | Top-1 and top-3 diagnostic accuracy for the three types of clinicians (dermatologists, Derm; primary care physicians, PCP; and nurse practitioners, NP) on validation set B (n=963).** Each clinician graded approximately one-third of the cases (number of cases graded: median = 321, range 320-322). For each clinician, performance of the deep learning system (DLS) is also reported on the same cases graded by that clinician (shaded in gray). Bold indicates the higher of the two: clinician or DLS based on each evaluation metric. In particular, Accuracy<sub>any</sub> measures the agreement of the top-1 and top-3 diagnoses with *any* of the panel of three dermatologists comprising the reference standard.

| Clinician Type / ID | Top 1     |             |                         |             | Top 3     |             |                         |             | Average Overlap (AO) |             |
|---------------------|-----------|-------------|-------------------------|-------------|-----------|-------------|-------------------------|-------------|----------------------|-------------|
|                     | Accuracy  |             | Accuracy <sub>any</sub> |             | Accuracy  |             | Accuracy <sub>any</sub> |             |                      |             |
|                     | Clinician | DLS         | Clinician               | DLS         | Clinician | DLS         | Clinician               | DLS         | Clinician            | DLS         |
| Derm 1              | 0.57      | <b>0.68</b> | 0.70                    | <b>0.79</b> | 0.68      | <b>0.93</b> | 0.79                    | <b>0.98</b> | 0.54                 | <b>0.65</b> |
| Derm 2              | 0.66      | <b>0.64</b> | <b>0.83</b>             | 0.75        | 0.80      | <b>0.87</b> | 0.93                    | <b>0.95</b> | <b>0.62</b>          | 0.61        |
| Derm 3              | 0.66      | <b>0.67</b> | 0.81                    | <b>0.83</b> | 0.78      | <b>0.91</b> | 0.91                    | <b>0.98</b> | 0.59                 | <b>0.64</b> |
| Derm 4              | 0.58      | <b>0.66</b> | 0.74                    | <b>0.80</b> | 0.69      | <b>0.92</b> | 0.82                    | <b>0.97</b> | 0.54                 | <b>0.63</b> |
| Derm 5              | 0.64      | <b>0.67</b> | 0.74                    | <b>0.79</b> | 0.80      | <b>0.90</b> | 0.88                    | <b>0.95</b> | 0.60                 | <b>0.62</b> |
| Derm 6              | 0.63      | <b>0.66</b> | 0.75                    | <b>0.79</b> | 0.73      | <b>0.88</b> | 0.84                    | <b>0.97</b> | 0.56                 | <b>0.64</b> |
| PCP 1               | 0.44      | <b>0.70</b> | 0.55                    | <b>0.82</b> | 0.67      | <b>0.93</b> | 0.80                    | <b>0.97</b> | 0.46                 | <b>0.66</b> |
| PCP 2               | 0.49      | <b>0.66</b> | 0.64                    | <b>0.77</b> | 0.74      | <b>0.87</b> | 0.86                    | <b>0.95</b> | 0.54                 | <b>0.61</b> |
| PCP 3               | 0.43      | <b>0.64</b> | 0.61                    | <b>0.79</b> | 0.53      | <b>0.90</b> | 0.70                    | <b>0.98</b> | 0.43                 | <b>0.62</b> |
| PCP 4               | 0.48      | <b>0.66</b> | 0.62                    | <b>0.78</b> | 0.50      | <b>0.90</b> | 0.63                    | <b>0.96</b> | 0.42                 | <b>0.63</b> |
| PCP 5               | 0.43      | <b>0.65</b> | 0.57                    | <b>0.78</b> | 0.51      | <b>0.90</b> | 0.65                    | <b>0.97</b> | 0.43                 | <b>0.63</b> |
| PCP 6               | 0.38      | <b>0.68</b> | 0.53                    | <b>0.82</b> | 0.65      | <b>0.90</b> | 0.81                    | <b>0.97</b> | 0.47                 | <b>0.64</b> |
| NP 1                | 0.42      | <b>0.70</b> | 0.57                    | <b>0.81</b> | 0.53      | <b>0.93</b> | 0.66                    | <b>0.97</b> | 0.43                 | <b>0.65</b> |
| NP 2                | 0.35      | <b>0.63</b> | 0.46                    | <b>0.74</b> | 0.55      | <b>0.87</b> | 0.72                    | <b>0.95</b> | 0.42                 | <b>0.61</b> |
| NP 3                | 0.43      | <b>0.67</b> | 0.56                    | <b>0.83</b> | 0.58      | <b>0.91</b> | 0.73                    | <b>0.98</b> | 0.44                 | <b>0.64</b> |
| NP 4                | 0.38      | <b>0.64</b> | 0.54                    | <b>0.76</b> | 0.40      | <b>0.90</b> | 0.56                    | <b>0.95</b> | 0.36                 | <b>0.63</b> |

|      |      |             |      |             |      |             |      |             |      |             |
|------|------|-------------|------|-------------|------|-------------|------|-------------|------|-------------|
| NP 5 | 0.41 | <b>0.71</b> | 0.50 | <b>0.83</b> | 0.60 | <b>0.93</b> | 0.72 | <b>0.98</b> | 0.43 | <b>0.65</b> |
| NP 6 | 0.43 | <b>0.64</b> | 0.59 | <b>0.78</b> | 0.65 | <b>0.87</b> | 0.81 | <b>0.97</b> | 0.47 | <b>0.62</b> |



**Supplementary Table 9 | Labeling tool prompts and instructions.**

| Question                                              |                         | Possible answers ( <u>underlined</u> ), with explanations if applicable                                                                                                                                                                                                                                                                                                                                       |
|-------------------------------------------------------|-------------------------|---------------------------------------------------------------------------------------------------------------------------------------------------------------------------------------------------------------------------------------------------------------------------------------------------------------------------------------------------------------------------------------------------------------|
| Are multiple conditions present in this case?         |                         | <p><u>Yes</u>*: if more than one condition related to this patient's chief complaint is present</p> <p><u>Possibly</u>*: if more than one condition may be present</p> <p><u>No</u>: if there is a single skin condition</p>                                                                                                                                                                                  |
| Can you describe a differential given the case?       |                         | <p><u>Yes</u>: if one can provide a diagnosis.</p> <p><u>No</u>*: if one cannot provide any diagnosis. This can be due to poor image quality, minimum pathology, insufficient medical information, etc.</p>                                                                                                                                                                                                   |
| Please provide your top three differential diagnosis: | What is the condition?  | <p><u>SNOMED texts synonyms</u>: an autocomplete menu that contains all synonyms for SNOMED entries pertaining to cutaneous disease is available to select from. If there are several variations of the condition, use the most specific condition that applies to the case. If none found, then:</p> <p><u>Free text</u>: an additional text field is provided for labelers to enter any free-form text.</p> |
|                                                       | Confidence of diagnosis | <p><u>5</u>: most certain about the condition.</p> <p><u>4</u>:</p> <p><u>3</u>:</p> <p><u>2</u>:</p> <p><u>1</u>: least certain about the condition.</p>                                                                                                                                                                                                                                                     |

\* If these answers are selected, the remaining questions are skipped.

**Supplementary Table 10 | Full list of 419 skin conditions that answers from dermatologists, PCPs, and NPs were mapped to.** The top 26 conditions on which the DLS was trained and evaluated on are highlighted in bold. The remaining 393 conditions (in aggregate comprising roughly 20% of the cases in this dataset) were mapped to “Other”.

| A-C                                        | D-H                                           | I-M                                           | N-P                                                            | R-Z                                                   |
|--------------------------------------------|-----------------------------------------------|-----------------------------------------------|----------------------------------------------------------------|-------------------------------------------------------|
| Abscess                                    | Deep fungal infection                         | Ichthyosis                                    | Nail dystrophy due to trauma                                   | RMSF - Rocky Mountain spotted fever                   |
| Acanthoma fissuratum                       | Dental fistula                                | Idiopathic exfoliative cheilitis              | Nasal polyp                                                    | Radiation dermatitis                                  |
| Acanthosis nigricans                       | Dermatitis herpetiformis                      | Idiopathic guttate hypomelanosis              | Nasolabial dyssebacia                                          | Raynaud's phenomenon                                  |
| Accessory nipple                           | Dermatofibroma                                | IgA pemphigus                                 | Necrobiosis lipoidica                                          | Relapsing polychondritis                              |
| <b>Acne</b>                                | Dermatofibrosarcoma protuberans               | Impetigo                                      | Necrolytic acral erythema                                      | Remove from labeling tool                             |
| Acne keloidalis                            | Dermatomyositis                               | Incontinentia pigmenti                        | Necrotizing fasciitis                                          | Retention hyperkeratosis                              |
| Acquired digital fibrokeratoma             | Dermatosis caused by lice                     | Induced hypopigmentation                      | Neuralgia paresthetica                                         | Reticular erythematous mucinosis                      |
| Acral keratosis                            | Dermoid cyst of skin                          | Infected eczema                               | Neutrophilic eccrine hidradenitis                              | Reticulate erythematous mucinosis                     |
| Acral peeling skin syndrome                | Desmoplastic trichoepithelioma                | Infected skin ulcer                           | Nevus anemicus                                                 | Reticular erythematous mucinosis                      |
| Acrocyanosis                               | Diabetic dermopathy                           | Inflammatory linear verrucous epidermal nevus | Nevus comedonicus                                              | Reticulohistiocytosis                                 |
| Acrodermatitis atrophicans chronica        | Diabetic ulcer                                | Inflicted skin lesions                        | Nevus depigmentosus                                            | Rheumatoid nodule                                     |
| Acropustulosis of infancy                  | Digital Myxoid Cyst                           | Ingrown hair                                  | Nevus lipomatosis                                              | Rhytides                                              |
| <b>Actinic Keratosis</b>                   | Digital mucous cyst                           | Injection site disorder                       | Nevus of Ito                                                   | Rosacea                                               |
| Actinic granuloma                          | Dissecting cellulitis of scalp                | Insect Bite                                   | Nevus of Ota                                                   | <b>SCC/SCCIS</b>                                      |
| Acute generalised exanthematous pustulosis | Dowling-degos syndrome                        | Interstitial granulomatous dermatitis         | Nevus sebaceous                                                | SJS/TEN                                               |
| Adnexal neoplasm                           | Drug Rash                                     | Intertrigo                                    | Nevus spilus                                                   | <b>SK/ISK</b>                                         |
| Adult onset still disease                  | Eccrine carcinoma of skin                     | Inverted follicular keratosis                 | Nodular vasculitis                                             | Scabies                                               |
| Albinism                                   | Ecthyma                                       | Irritant Contact Dermatitis                   | Non-melanin pigmentation due to exogenous substance (disorder) | <b>Scar Condition</b>                                 |
| <b>Allergic Contact Dermatitis</b>         | <b>Eczema</b>                                 | Juvenile xanthogranuloma                      | O/E - ecchymoses present                                       | Scleredema                                            |
| <b>Alopecia Areata</b>                     | Edema bulla                                   | Kaposi's sarcoma of skin                      | Notalgia paresthetica                                          | Sclerodactyly                                         |
| Alopecia mucinosa                          | Epidermal nevus                               | Keratolysis exfoliativa                       | Ochrochrosis                                                   | Sebaceous adenoma of skin                             |
| Alopecia neurotica                         | Epidermolysis bullosa                         | Keratosis pilaris                             | Onychocryptosis                                                | Sebaceous carcinoma                                   |
| Amyloidosis of skin                        | Erosive pustular dermatosis                   | Knuckle pads                                  | Onychogryphosis                                                | Sebaceous hyperplasia                                 |
| Anagen effluvium                           | Eruptive xanthoma                             | <b>Lentigo</b>                                | Onycholysis                                                    | <b>Seborrheic Dermatitis</b>                          |
| <b>Androgenetic Alopecia</b>               | Erysipelas                                    | Leprosy                                       | Onychomadesis                                                  | <b>Skin Tag</b>                                       |
| Anetoderma                                 | Erythema ab igne                              | Leukemia cutis                                | Onychomalacia                                                  | Skin and soft tissue atypical mycobacterial infection |
| Angina bullosa hemorrhagica                | Erythema annulare centrifugum                 | Leukocytoclastic Vasculitis                   | Onychomatricoma                                                | Skin atrophy                                          |
| Angioedema                                 | Erythema dyschromicum perstans                | Leukonychia                                   | Onychomycosis                                                  | Skin changes due to malnutrition                      |
| Angiofibroma                               | Erythema elevatum diutinum                    | Leukoplakia of skin                           | Onychopapilloma                                                | Skin lesion in drug addict                            |
| Angiokeratoma of skin                      | Erythema gyratum repens                       | Lichen Simplex Chronicus                      | Onychorrhexis                                                  | Skin striae                                           |
| Angiolympoid hyperplasia with eosinophilia | Erythema marginatum                           | Lichen nitidus                                | Onychoschizia                                                  | Small plaque parapsoriasis                            |
| Angiosarcoma of skin                       | Erythema migrans                              | Lichen planopilaris                           | Oral fibroma                                                   | Small vessel thrombosis of skin                       |
| Animal bite - wound                        | Erythema multiforme                           | Lichen planus/lichenoid eruption              | Osteoarthritis                                                 | Sneddon-Wilkinson disease                             |
| Apocrine cystadenoma                       | Erythema nodosum                              | Lichen sclerosus                              | Osteoma                                                        | <b>Stasis Dermatitis</b>                              |
| Arsenical keratosis                        | Erythrasma                                    | Lichen spinulosus                             | Osteoma cutis                                                  | Subungual fibroma                                     |
| Arterial ulcer                             | Erythromelalgia                               | Lichen striatus                               | Otitis externa                                                 | Sweet syndrome                                        |
| Arteriovenous malformation                 | Erythromelanosis follicularis faciei et colli | Lichenoid keratosis                           | Paget disease                                                  | Symmetrical dyschromatosis of extremities             |
| Atrophic glossitis                         | Fat necrosis                                  | Lichenoid myxedema                            | Palisaded neutrophilic granulomatous dermatitis                | Syphilis                                              |
| Atrophoderma                               | Fibrofolliculoma                              | Linear IgA disease                            | Palmar pit                                                     | TMEP - telangiectasia macularis eruptiva perstans     |
| Atrophoderma vermiculatum                  | Flagellate erythema                           | Lipoatrophy                                   | Papilloma of skin                                              | Tattoo                                                |
| Atypical Nevus                             | Flegels disease                               | Lipodermatosclerosis                          | Parapsoriasis                                                  | Telangiectasia disorder                               |
| Atypical fibroxanthoma of skin             | Flushing                                      | Lipoid proteinosis                            | Paronychia                                                     | Telogen effluvium                                     |
| B-Cell Cutaneous Lymphoma                  | Focal epithelial hyperplasia of skin          | Lipoma                                        | Pearly penile papules                                          | Thrombophlebitis                                      |
| <b>Basal Cell Carcinoma</b>                | <b>Folliculitis</b>                           | Lipschütz ulcer                               | Pemphigoid gestationis                                         | <b>Tinea</b>                                          |
| Beau's lines                               | Folliculitis decalvans                        | Livedo reticularis                            | Pemphigus foliaceus                                            | <b>Tinea Versicolor</b>                               |
| Becker's nevus                             | Fordyce spots                                 | Livedoid vasculopathy                         | Pemphigus paraneoplastica                                      | Torus palatinus                                       |
| Benign neoplasm of nail apparatus          | Foreign body                                  | Lobomycosis                                   | Pemphigus vulgaris                                             | Trachyonychia                                         |
| Benign neural tumor                        | Foreign body reaction of the skin             | Local infection of wound                      | Perforating dermatosis                                         | Traction alopecia                                     |
| Benign salivary gland tumor                | Fox-Fordyce disease                           | Longitudinal melanonychia                     | Perichondritis of auricle                                      | Traumatic bulla                                       |
| Blistering distal dactylitis               | Frontal fibrosing alopecia                    | Lymphadenopathy                               | Perioral Dermatitis                                            | Traumatic ulcer                                       |
| Blue sacral spot                           | Ganglion cyst                                 | Lymphangioma                                  | Periungual fibroma                                             | Triangular alopecia                                   |
| Bowenoid papulosis                         | Geographic tongue                             | Lymphedema                                    | Perleche                                                       | Trichostasis spinulosa                                |
|                                            | Giant cell tumor                              | Lymphomatoid papulosis                        | Phimosis                                                       | Trichotillomania                                      |
|                                            |                                               | Madarosis                                     | Photodermatitis                                                | Trigeminal trophic syndrome                           |
|                                            |                                               | Malignant cylindroma                          | Phrynoderma                                                    |                                                       |
|                                            |                                               |                                               | Piezogenic pedal papule                                        |                                                       |

|                                          |                                  |                                                 |                                                      |                                              |
|------------------------------------------|----------------------------------|-------------------------------------------------|------------------------------------------------------|----------------------------------------------|
| Brachioradial pruritus                   | Glomus tumour of skin            | Malignant eccrine spiradenoma                   | Pigmented fungiform papillae                         | Tripe palms                                  |
| Breast cancer                            | Gout                             | Mastocytoma                                     | Pigmented purpuric eruption                          | Tuberculosis of skin and subcutaneous tissue |
| Bullosis diabeticorum                    | Graft versus host disease        | Mastocytosis                                    | Pilomatricoma                                        | Ulceration in Behcet disease                 |
| Bullous Pemphigoid                       | Granular parakeratosis           | Median rhomboid glossitis                       | Pilonidal cyst                                       | <b>Urticaria</b>                             |
| Burn of skin                             | Granuloma annulare               | Melanin pigmentation due to exogenous substance | Pincer nail deformity                                | Urticaria multiforme                         |
| Bursitis                                 | Granuloma faciale                | <b>Melanocytic Nevus</b>                        | Pinkus tumor                                         | Varicose veins of lower extremity            |
| Cafe au lait macule                      | Granulomatous cheilitis          | <b>Melanoma</b>                                 | Pitted keratolysis                                   | Venous Stasis Ulcer                          |
| Calcinosis cutis                         | Grover's disease                 | Melanotic macule                                | Pityriasis alba                                      | <b>Verruca vulgaris</b>                      |
| Calciophylaxis cutis                     | Hailey Hailey disease            | Melasma                                         | Pityriasis amiantacea                                | Viral Exanthem                               |
| Candida                                  | Hair nevus                       | Merkel Cell Carcinoma                           | Pityriasis lichenoides                               | <b>Vitiligo</b>                              |
| Canker sore                              | Hair sinus                       | Morphea/Scleroderma                             | Pityriasis rosea                                     | Warty dyskeratoma                            |
| Carotene pigmentation of skin            | Hairy tongue                     | Morsicatio buccarum                             | Pityriasis rotunda                                   | Wells' syndrome                              |
| Cellulitis                               | Half-and-half nail               | Mucocele                                        | Pityriasis rubra pilaris                             | Wooly hair                                   |
| Central centrifugal cicatricial alopecia | Hand foot and mouth disease      | Mucocutaneous venous malformation               | Pleomorphic fibroma                                  | Xanthoma                                     |
| Chancroid                                | Head lice                        |                                                 | Poikiloderma                                         | Xerosis                                      |
| Chemical leukoderma                      | Head lice                        |                                                 | Porokeratosis                                        | Yellow nail syndrome                         |
| Chicken pox exanthem                     | Hemangioma                       |                                                 | Porphyria cutanea tarda                              | Zoon's balanitis                             |
| Chilblain                                | Hematoma of skin                 |                                                 | <b>Post-Inflammatory hyperpigmentation</b>           | Zosteriform reticulate hyperpigmentation     |
| Chondrodermatitis nodularis              | Hemorrhoid                       |                                                 | Post-Inflammatory hypopigmentation                   |                                              |
| Cicatricial Pemphigoid                   | Hemosiderin pigmentation of skin |                                                 | Pressure ulcer                                       |                                              |
| Clavus                                   | Herpes Simplex                   |                                                 | Pressure-induced dermatosis                          |                                              |
| Clear cell acanthoma                     | Herpes Zoster                    |                                                 | Pretibial myxedema                                   |                                              |
| Clubbing of fingers                      | <b>Hidradenitis</b>              |                                                 | Primary cutaneous sarcoma                            |                                              |
| Collagenoma                              | Hirsutism                        |                                                 | Progressive macular hypomelanosis                    |                                              |
| Colloid milium                           | Hordeolum internum               |                                                 | Prurigo nodularis                                    |                                              |
| Comedone                                 | Hyperhidrosis                    |                                                 | Pruritic urticarial papules and plaques of pregnancy |                                              |
| Condyloma acuminatum                     | Hypersensitivity                 |                                                 | Pseudocyst of auricle                                |                                              |
| Confluent and reticulate papillomatosis  | Hypertrichosis                   |                                                 | Pseudolymphoma                                       |                                              |
| Congenital alopecia                      |                                  |                                                 | Pseudopelade                                         |                                              |
| Connective tissue nevus                  |                                  |                                                 | <b>Psoriasis</b>                                     |                                              |
| Crohn disease of skin                    |                                  |                                                 | Psychogenic alopecia                                 |                                              |
| Cutaneous T Cell Lymphoma                |                                  |                                                 | Pterygium of nail                                    |                                              |
| Cutaneous capillary malformation         |                                  |                                                 | Puncture wound - injury                              |                                              |
| Cutaneous collagenous vasculopathy       |                                  |                                                 | Purpura                                              |                                              |
| Cutaneous larva migrans                  |                                  |                                                 | Pyoderma Gangrenosum                                 |                                              |
| Cutaneous leishmaniasis                  |                                  |                                                 | Pyogenic granuloma                                   |                                              |
| Cutaneous lupus                          |                                  |                                                 |                                                      |                                              |
| Cutaneous lymphadenoma                   |                                  |                                                 |                                                      |                                              |
| Cutaneous metastasis                     |                                  |                                                 |                                                      |                                              |
| Cutaneous myiasis                        |                                  |                                                 |                                                      |                                              |
| Cutaneous neurofibroma                   |                                  |                                                 |                                                      |                                              |
| Cutaneous neuroma                        |                                  |                                                 |                                                      |                                              |
| Cutaneous sarcoidosis                    |                                  |                                                 |                                                      |                                              |
| Cutaneous schistosomiasis                |                                  |                                                 |                                                      |                                              |
| Cutaneous sporotrichosis                 |                                  |                                                 |                                                      |                                              |
| Cutis laxa                               |                                  |                                                 |                                                      |                                              |
| Cutis verticis gyrata                    |                                  |                                                 |                                                      |                                              |
| Cylindroma of skin                       |                                  |                                                 |                                                      |                                              |
| <b>Cyst</b>                              |                                  |                                                 |                                                      |                                              |

**Supplementary Table 11 | Hyperparameters for training the deep learning system.**

|                                                        |                                                                                                                                                                                                                                    |
|--------------------------------------------------------|------------------------------------------------------------------------------------------------------------------------------------------------------------------------------------------------------------------------------------|
| Image augmentations                                    | Image size: 459×459 pixels<br>Saturation delta: [0.5597, 1.2749]<br>Contrast delta: [0.9997, 1.7705]<br>Brightness max delta: 0.1148<br>Hue max delta: 0.0251<br>Rotation: [-150, 150] (degrees)<br>Flipping: horizontal, vertical |
| Bounding box augmentations                             | Minimum overlap with any pathologic region: 0.2<br>Aspect ratio: [0.9, 1.1]<br>Proportion over the original image: [0.05, 1.0]                                                                                                     |
| Metadata augmentations                                 | Dropout rate: 0.1                                                                                                                                                                                                                  |
| Learning rate schedule<br>(exponential decay schedule) | Base rate: 0.001<br>Decay rate: 0.99<br>Number of epochs per decay: 2.0                                                                                                                                                            |
| Adam optimizer                                         | Decay for the first moment estimates: 0.9<br>Decay for the second moment estimates: 0.999<br>Epsilon: 0.1                                                                                                                          |
| Batch size                                             | 8                                                                                                                                                                                                                                  |
| Regularization                                         | Prelogits dropout rate: 0.2<br>Weight decay: 0.00004<br>Batch norm decay: 0.9997                                                                                                                                                   |
| Loss function                                          | Softmax cross-entropy with class-specific weights                                                                                                                                                                                  |
| Class weighting                                        | Weight for each class is determined as: $1 / c^{1-s}$<br>Where c is the class counts over the training set, and s is a smoothing factor of 0.7.                                                                                    |

**Supplementary Table 12 | Performance of the deep learning system (DLS) and different types of clinicians, on validation sets A and B.** This is similar to Supplementary Table 2, except performance was measured by the agreement of the top-1 and top-3 diagnoses with *any* of the panel of three dermatologists comprising the reference standard. In other words, whether the top k predictions of the DLS or clinician captures the primary diagnosis of any member of the panel. For agreement with a differential diagnosis based on the “votes” of the panel, see Supplementary Table 2. Numbers in square braces indicate 95% confidence intervals (see Statistical Analysis). Bold indicates the highest value within each column for validation set B.

| Dataset                                                  | “Grader” | Top-1                    | Top-3                    |
|----------------------------------------------------------|----------|--------------------------|--------------------------|
|                                                          |          | Accuracy <sub>any</sub>  | Accuracy <sub>any</sub>  |
| Validation set A (n=3,756)                               | DLS      | 0.82 [0.81, 0.83]        | 0.98 [0.97, 0.98]        |
| Validation set B<br>(enriched subset of set A,<br>n=963) | DLS      | <b>0.79 [0.77, 0.82]</b> | <b>0.97 [0.96, 0.98]</b> |
|                                                          | Derm     | 0.76 [0.74, 0.78]        | 0.86 [0.84, 0.88]        |
|                                                          | PCP      | 0.59 [0.56, 0.61]        | 0.74 [0.72, 0.76]        |
|                                                          | NP       | 0.54 [0.51, 0.56]        | 0.70 [0.68, 0.72]        |

**Supplementary Table 13 | Performance of the deep learning system (DLS), stratified by self-reported demographic information (including age, sex, race and ethnicity), and Fitzpatrick skin type on validation set A (n=3,756).** Metrics used are identical to the ones in Supplementary Table 12. Numbers in square braces indicate 95% confidence intervals (see Statistical Analysis).

| Breakdown             | Category                                   | Top-1                   | Top-3                   |
|-----------------------|--------------------------------------------|-------------------------|-------------------------|
|                       |                                            | Accuracy <sub>any</sub> | Accuracy <sub>any</sub> |
| Age                   | [18, 30) (29.5%)                           | 0.85 [0.83, 0.87]       | 0.98 [0.97, 0.99]       |
|                       | [30, 40) (19.9%)                           | 0.81 [0.78, 0.83]       | 0.97 [0.96, 0.98]       |
|                       | [40, 50) (17.3%)                           | 0.83 [0.80, 0.86]       | 0.98 [0.98, 0.99]       |
|                       | [50, 60) (18.6%)                           | 0.81 [0.79, 0.84]       | 0.97 [0.96, 0.98]       |
|                       | [60, 90] (14.6%)                           | 0.78 [0.75, 0.82]       | 0.98 [0.96, 0.99]       |
| Sex                   | Female (63.1%)                             | 0.83 [0.82, 0.85]       | 0.98 [0.97, 0.98]       |
|                       | Male (36.9%)                               | 0.81 [0.79, 0.83]       | 0.97 [0.96, 0.98]       |
| Race and ethnicity    | American Indian or Alaska Native (1.1%)    | 0.76 [0.64, 0.880]      | 0.95 [0.88, 1.00]       |
|                       | Asian (12.6%)                              | 0.85 [0.82, 0.88]       | 0.98 [0.97, 0.99]       |
|                       | Black or African American (6.1%)           | 0.82 [0.77, 0.87]       | 0.98 [0.96, 1.00]       |
|                       | Hispanic or Latino (43.4%)                 | 0.82 [0.81, 0.84]       | 0.98 [0.97, 0.98]       |
|                       | Native Hawaiian or Pacific Islander (1.6%) | 0.77 [0.66, 0.87]       | 1.00 [1.00, 1.00]       |
|                       | White (31.3%)                              | 0.81 [0.79, 0.83]       | 0.97 [0.97, 0.98]       |
|                       | Not specified (3.9%)                       | 0.83 [0.78, 0.89]       | 0.99 [0.97, 1.00]       |
| Fitzpatrick skin type | Type I (0.2%)                              | 0.78 [0.56, 1.00]       | 0.89 [0.67, 1.00]       |

|  |                  |                   |                   |
|--|------------------|-------------------|-------------------|
|  | Type II (10.2%)  | 0.83 [0.79, 0.87] | 0.97 [0.96, 0.99] |
|  | Type III (64.2%) | 0.82 [0.81, 0.84] | 0.98 [0.97, 0.99] |
|  | Type IV (19.3%)  | 0.82 [0.79, 0.85] | 0.97[0.96, 0.98]  |
|  | Type V (2.7%)    | 0.84 [0.77, 0.91] | 0.98 [0.95, 1.00] |
|  | Type VI (0.0%)   | 1.00*             | 1.00*             |
|  | Unknown (3.4%)   | 0.76 [0.68, 0.84] | 0.97 [0.93, 1.00] |

\* : There was only 1 case labeled as Type VI, so confidence intervals were not meaningful.
